# Supplementary material for: A comparative assessment ofin vitrocytotoxic activity and phytochemical profiling ofAndrographis nallamalayanaJ.L.Ellis andAndrographis paniculata(Burm. f.) Nees using UPLC-QTOF-MS/MS approach
Source: Royal Society of Chemistry journal article supplement (doi:10.1039/d1ra07496b), 2021-01-01
Supplement: d1ra07496b1.pdf [file d1ra07496b1.pdf]

## Supplementary Information (ESI)

### **A comparative assessment of *in-vitro* cytotoxic activity and phytochemical profiling of *Andrographis nallamalayana* J.L.Ellis and *Andrographis paniculata* (Burm.f.) Nees using UPLC-QTOF-MS/MS approach**

Narender Goel<sup>d,§</sup>, Rahul L. Gajbhiye<sup>a,§</sup>, Moumita Saha<sup>b,§</sup>, Chennuru Nagendra<sup>c</sup>, Araveeti Madhusudhana Reddy<sup>c</sup>, V. Ravichandiran<sup>a</sup>, Krishna Das Saha<sup>b</sup>, Parasuraman Jaisankar<sup>d\*</sup>

<sup>a</sup>*Department of Natural Products, National Institute of Pharmaceutical Educational and Research (NIPER), ChunilalBhawan, 168, Maniktala Main Road, 700054, Kolkata, India*

<sup>b</sup>*Cancer Biology and Inflammatory Disorder Division, CSIR–Indian Institute of Chemical Biology, 4, Raja S C Mullick Road, Jadavpur, Kolkata-700032, India.*

<sup>c</sup>*Department of Botany, Yogi Vemana University, Vemanapuram, Kadapa, Andhra Pradesh 516005, India.*

<sup>d</sup>*Laboratory of Catalysis and Chemical Biology, Department of Organic and Medicinal Chemistry, CSIR*

#### **\*Corresponding author**

Prof. Dr. Parasuraman Jaisankar

Laboratory of Catalysis and Chemical Biology, Department of Organic and Medicinal Chemistry, CSIR-Indian Institute of Chemical Biology, 4 Raja S. C. Mullick Road, Kolkata - 700032, India.

Tel.: +91-33-24995-790/774

**E-mail address:** [jaisankar@iicb.res.in](mailto:jaisankar@iicb.res.in)

## Table of Contents

|                                                                                                                                                                                                                                                         |     |
|---------------------------------------------------------------------------------------------------------------------------------------------------------------------------------------------------------------------------------------------------------|-----|
| <b>Table S1.</b> Compounds identified by UPLC-QTOF-MS (HRMS) analysis in methanolic extract of <i>A. nallampalayana</i> .....                                                                                                                           | S1  |
| <b>Table S2.</b> Compounds identified by UPLC-QTOF-MS (HRMS) analysis in methanolic extract of <i>A. paniculata</i> .....                                                                                                                               | S3  |
| <b>Table S3.</b> <i>In-silico</i> PASS prediction activity of compounds identified from the methanolic extract of <i>A. nallampalayana</i> .....                                                                                                        | S5  |
| <b>Table S4.</b> <i>In-silico</i> CLC-Pred cell line cytotoxicity prediction of compounds identified from the methanolic extract of <i>A. nallampalayana</i> . ....                                                                                     | S6  |
| <b>Figure S1.</b> Parts of studied Andrographis species <b>a)</b> Leaves of <i>Andrographis nallamalayana</i> ; <b>b)</b> Leaves of <i>A. paniculat</i> .....                                                                                           | S8  |
| <b>Figure S2.</b> Venn diagram for comparison of chemical constituents commonly present in both Andrographis species. <b>ANM)</b> <i>Andrographis nallamalayana</i> methanol extract; <b>APM)</b> <i>Andrographis paniculata</i> methanol extract. .... | S8  |
| <b>Figure S3.</b> MS/MS fragmentation spectra of the identified compounds from the methanolic extract of <i>A. nallamalayana</i> .....                                                                                                                  | S15 |
| <b>Figure S4.</b> HRMS spectra of <b>Compound 1</b> .....                                                                                                                                                                                               | S16 |
| <b>Figure S5.</b> Thermal ellipsoid plot of <b>Compound 1</b> . Ellipsoids are represented with 50% probability.....                                                                                                                                    | S16 |
| <b>Figure S6.</b> <sup>1</sup> H NMR of Compound 1.....                                                                                                                                                                                                 | S17 |
| <b>Figure S7.</b> <sup>13</sup> C NMR of Compound 1. ....                                                                                                                                                                                               | S17 |
| <b>Figure S8.</b> DEPT-90 NMR of Compound 1. ....                                                                                                                                                                                                       | S18 |
| <b>Figure S9.</b> DEPT-135 NMR of Compound 1. ....                                                                                                                                                                                                      | S18 |
| <b>Figure S10.</b> HRMS Spectra of Compound 2.....                                                                                                                                                                                                      | S19 |
| <b>Figure S11.</b> Thermal ellipsoid plot of <b>Compound 2</b> . Ellipsoids are represented with 50% probability.....                                                                                                                                   | S19 |
| <b>Figure S12.</b> <sup>1</sup> H NMR of Compound 2.....                                                                                                                                                                                                | S20 |
| <b>Figure S13.</b> <sup>13</sup> C NMR of Compound 2. ....                                                                                                                                                                                              | S20 |
| <b>Figure S14.</b> DEPT-90 NMR of Compound 2. ....                                                                                                                                                                                                      | S21 |
| <b>Figure S15.</b> DEPT-135 NMR Spectra of Compound 2. ....                                                                                                                                                                                             | S21 |
| <b>Figure S16.</b> HRMS Spectra of <b>Compound 3</b> . ....                                                                                                                                                                                             | S22 |
| <b>Figure S17.</b> Thermal ellipsoid plot of <b>Compound 3</b> . Ellipsoids are represented with 50% probability.....                                                                                                                                   | S22 |

|                                                                                                   |     |
|---------------------------------------------------------------------------------------------------|-----|
| <b>Figure S18.</b> $^1\text{H}$ NMR of <b>Compound 3</b> .                                        | S23 |
| <b>Figure S19.</b> $^{13}\text{C}$ NMR of <b>Compound 3</b> .                                     | S23 |
| <b>Figure S20.</b> DEPT-90 NMR of <b>Compound 3</b> .                                             | S24 |
| <b>Figure S21.</b> DEPT-135 NMR of <b>Compound 3</b> .                                            | S24 |
| <b>Figure S22:</b> Raw validation data and unprocessed original images of gels and western blots. | S25 |

**Table S1.** Compounds identified by UPLC-QTOF-MS (HRMS) analysis in methanolic extract of *A. nallampalayana*.

| General                                         |            |         | Compound Identification |        |       | Species/ Adduct                                                                  |                    |
|-------------------------------------------------|------------|---------|-------------------------|--------|-------|----------------------------------------------------------------------------------|--------------------|
| Formula                                         | <i>m/z</i> | Mass    | RT                      | Height | Score | Name                                                                             |                    |
| C <sub>17</sub> H <sub>16</sub> O <sub>7</sub>  | 331.081    | 332.088 | 0.51                    | 16508  | 76.38 | 3,4',5-Trihydroxy-3',7-dimethoxyflavanone                                        | [M-H] <sup>-</sup> |
| C <sub>16</sub> H <sub>26</sub> O <sub>11</sub> | 393.142    | 394.149 | 0.64                    | 300110 | 89.8  | 1-(3-Methyl-2-butenoyl)-6-apiosylglucose                                         | [M-H] <sup>-</sup> |
| C <sub>16</sub> H <sub>20</sub> O <sub>10</sub> | 371.100    | 372.107 | 0.69                    | 57779  | 91.72 | Veranisatin C                                                                    | [M-H] <sup>-</sup> |
| C <sub>18</sub> H <sub>18</sub> O <sub>10</sub> | 393.082    | 394.089 | 0.70                    | 10511  | 78.65 | 9-Hydroxy-4-methoxypsoralen 9-glucoside                                          | [M-H] <sup>-</sup> |
| C <sub>20</sub> H <sub>26</sub> O <sub>13</sub> | 473.131    | 474.138 | 0.73                    | 14813  | 94.75 | Trans-Caffeic acid [apiosyl-(1->6)-glucosyl] ester                               | [M-H] <sup>-</sup> |
| C <sub>16</sub> H <sub>28</sub> O <sub>11</sub> | 395.156    | 396.163 | 0.82                    | 7852   | 78.82 | 1-(3-Methylbutanoyl)-6-apiosylglucose                                            | [M-H] <sup>-</sup> |
| C <sub>16</sub> H <sub>22</sub> O <sub>10</sub> | 373.115    | 374.122 | 0.86                    | 15911  | 75.63 | Gardoside                                                                        | [M-H] <sup>-</sup> |
| C <sub>14</sub> H <sub>20</sub> O <sub>8</sub>  | 315.110    | 316.117 | 0.91                    | 91864  | 91.87 | Vanilloside                                                                      | [M-H] <sup>-</sup> |
| C <sub>16</sub> H <sub>24</sub> O <sub>10</sub> | 375.131    | 376.138 | 0.96                    | 227160 | 89.37 | (1R,2R)-Guaiacylglycerol 1-glucoside                                             | [M-H] <sup>-</sup> |
| C <sub>15</sub> H <sub>20</sub> O <sub>10</sub> | 359.099    | 360.107 | 0.97                    | 20193  | 78.75 | 6'-Methoxypolygoacetophenoside                                                   | [M-H] <sup>-</sup> |
| C <sub>13</sub> H <sub>16</sub> O <sub>8</sub>  | 299.078    | 300.085 | 1.14                    | 26797  | 77.01 | Dimethyl fukiic acid                                                             | [M-H] <sup>-</sup> |
| C <sub>19</sub> H <sub>18</sub> O <sub>10</sub> | 405.081    | 406.089 | 1.53                    | 23613  | 80.03 | Lancerin                                                                         | [M-H] <sup>-</sup> |
| C <sub>16</sub> H <sub>18</sub> O <sub>9</sub>  | 353.090    | 354.318 | 1.66                    | 44017  | 94.05 | Chlorogenic Acid                                                                 | [M-H] <sup>-</sup> |
| C <sub>16</sub> H <sub>18</sub> O <sub>9</sub>  | 353.090    | 354.316 | 1.81                    | 91792  | 86.26 | 1- <i>O</i> -Caffeoylquinic acid                                                 | [M-H] <sup>-</sup> |
| C <sub>22</sub> H <sub>22</sub> O <sub>12</sub> | 477.105    | 478.421 | 2.21                    | 52316  | 88.11 | Isorhamnetin 3-glucoside                                                         | [M-H] <sup>-</sup> |
| C <sub>25</sub> H <sub>24</sub> O <sub>12</sub> | 515.122    | 516.454 | 2.48                    | 22200  | 92.99 | 3,4-Di- <i>O</i> -caffeoylquinic acid                                            | [M-H] <sup>-</sup> |
| C <sub>22</sub> H <sub>22</sub> O <sub>11</sub> | 461.111    | 462.433 | 2.83                    | 47475  | 97.22 | Hispidulin 7-glucoside (Homoplantaginin)                                         | [M-H] <sup>-</sup> |
| C <sub>16</sub> H <sub>26</sub> O <sub>8</sub>  | 345.157    | 346.164 | 3.67                    | 74442  | 77.51 | Glucosyl 6-hydroxy-2,6-dimethyl-2E,7-octadienoate                                | [M-H] <sup>-</sup> |
| C <sub>28</sub> H <sub>32</sub> O <sub>17</sub> | 639.158    | 640.165 | 3.69                    | 21080  | 89.09 | Rhamnetin 3-sophoroside                                                          | [M-H] <sup>-</sup> |
| C <sub>23</sub> H <sub>24</sub> O <sub>12</sub> | 491.121    | 492.128 | 3.81                    | 109228 | 91.53 | Andrographidine B                                                                | [M-H] <sup>-</sup> |
| C <sub>21</sub> H <sub>20</sub> O <sub>11</sub> | 447.095    | 448.465 | 3.82                    | 8134   | 82.2  | Luteolin 4'-glucoside                                                            | [M-H] <sup>-</sup> |
| C <sub>28</sub> H <sub>24</sub> O <sub>13</sub> | 567.118    | 568.512 | 3.94                    | 615443 | 89.46 | Neobignonoside                                                                   | [M-H] <sup>-</sup> |
| C <sub>23</sub> H <sub>22</sub> O <sub>11</sub> | 473.110    | 474.118 | 4.18                    | 113468 | 92.79 | Betavul garinglucoside                                                           | [M-H] <sup>-</sup> |
| C <sub>25</sub> H <sub>24</sub> O <sub>12</sub> | 515.121    | 516.128 | 4.20                    | 194542 | 92.11 | 1,3-Dicaffeoylquinic acid                                                        | [M-H] <sup>-</sup> |
| C <sub>30</sub> H <sub>36</sub> O <sub>14</sub> | 619.202    | 620.209 | 4.31                    | 8631   | 87.56 | Matsutakeside I                                                                  | [M-H] <sup>-</sup> |
| C <sub>27</sub> H <sub>22</sub> O <sub>12</sub> | 537.103    | 538.110 | 4.39                    | 57544  | 98.52 | Melitric acid A                                                                  | [M-H] <sup>-</sup> |
| C <sub>27</sub> H <sub>34</sub> O <sub>12</sub> | 549.199    | 550.206 | 4.40                    | 12572  | 74.15 | Eucommin A                                                                       | [M-H] <sup>-</sup> |
| C <sub>26</sub> H <sub>32</sub> O <sub>11</sub> | 519.188    | 520.195 | 4.40                    | 10682  | 73.58 | (7'S,8'S)-4,7'-Epoxy-3,8'-bilign-7-ene-3',5-dimethoxy-4',9,9'-triol 4'-glucoside | [M-H] <sup>-</sup> |
| C <sub>28</sub> H <sub>32</sub> O <sub>16</sub> | 623.163    | 624.170 | 4.41                    | 17113  | 88.25 | 6,8-Diglucosyldiosmetin                                                          | [M-H] <sup>-</sup> |
| C <sub>30</sub> H <sub>26</sub> O <sub>15</sub> | 625.121    | 626.128 | 4.53                    | 10593  | 91.65 | 6''-Caffeoylhyperin                                                              | [M-H] <sup>-</sup> |
| C <sub>22</sub> H <sub>22</sub> O <sub>11</sub> | 461.112    | 462.443 | 4.62                    | 87630  | 98.93 | 5,2',6'-Trihydroxy-7-methoxyflavone 2'- <i>O</i> -β-D-glucopyranoside            | [M-H] <sup>-</sup> |

|                                                 |         |         |       |        |       |                                                           |                    |
|-------------------------------------------------|---------|---------|-------|--------|-------|-----------------------------------------------------------|--------------------|
| C <sub>22</sub> H <sub>22</sub> O <sub>11</sub> | 461.112 | 462.122 | 4.77  | 96037  | 79.40 | Luteolin 7-methyl ether 5-glucoside                       | [M-H] <sup>-</sup> |
| C <sub>21</sub> H <sub>30</sub> O <sub>8</sub>  | 409.188 | 410.195 | 4.91  | 5251   | 70.08 | Pteroside D                                               | [M-H] <sup>-</sup> |
| C <sub>16</sub> H <sub>18</sub> O <sub>8</sub>  | 337.095 | 338.315 | 4.94  | 20853  | 95.20 | 3-p-Coumaroylquinic acid                                  | [M-H] <sup>-</sup> |
| C <sub>22</sub> H <sub>22</sub> O <sub>11</sub> | 461.112 | 462.408 | 5.07  | 28512  | 96.26 | Scutellarein 7-methyl ether 6-galactoside                 | [M-H] <sup>-</sup> |
| C <sub>28</sub> H <sub>24</sub> O <sub>12</sub> | 551.121 | 552.128 | 5.40  | 46234  | 94.19 | Schizotenuin F                                            | [M-H] <sup>-</sup> |
| C <sub>29</sub> H <sub>26</sub> O <sub>13</sub> | 581.133 | 582.512 | 5.43  | 133130 | 94.07 | 2''-O-Vanilloylvitexin                                    | [M-H] <sup>-</sup> |
| C <sub>36</sub> H <sub>38</sub> O <sub>16</sub> | 725.210 | 726.217 | 5.52  | 10093  | 92.36 | Licorice glycoside A                                      | [M-H] <sup>-</sup> |
| C <sub>23</sub> H <sub>22</sub> O <sub>10</sub> | 457.115 | 458.122 | 5.52  | 129601 | 94.23 | 6''-O-Acetyldaidzin                                       | [M-H] <sup>-</sup> |
| C <sub>37</sub> H <sub>50</sub> O <sub>20</sub> | 813.283 | 814.290 | 5.60  | 13846  | 93.31 | Jionoside B1                                              | [M-H] <sup>-</sup> |
| C <sub>26</sub> H <sub>38</sub> O <sub>13</sub> | 557.225 | 558.233 | 5.68  | 4417   | 72.58 | Glaucarubol 15-O- β -D-glucopyranoside                    | [M-H] <sup>-</sup> |
| C <sub>30</sub> H <sub>30</sub> O <sub>15</sub> | 629.149 | 630.156 | 5.74  | 5453   | 70.59 | 4-(4-Hydroxyphenyl)-2-butanone O-[2,6-digalloylglucoside] | [M-H] <sup>-</sup> |
| C <sub>21</sub> H <sub>18</sub> O <sub>11</sub> | 445.079 | 446.086 | 6.06  | 92483  | 94.37 | Apigenin 7-O-β-glucuronide                                | [M-H] <sup>-</sup> |
| C <sub>23</sub> H <sub>24</sub> O <sub>11</sub> | 475.126 | 476.134 | 6.08  | 471825 | 87.79 | Andrographidine D                                         | [M-H] <sup>-</sup> |
| C <sub>21</sub> H <sub>18</sub> O <sub>10</sub> | 429.085 | 430.476 | 6.13  | 49990  | 97.21 | Chrysin 7-glucuronide                                     | [M-H] <sup>-</sup> |
| C <sub>23</sub> H <sub>24</sub> O <sub>11</sub> | 475.126 | 476.133 | 6.22  | 88020  | 94.01 | Andropaniculoside A                                       | [M-H] <sup>-</sup> |
| C <sub>25</sub> H <sub>24</sub> O <sub>10</sub> | 483.131 | 484.138 | 6.34  | 16685  | 94.09 | Silidianin                                                | [M-H] <sup>-</sup> |
| C <sub>27</sub> H <sub>30</sub> O <sub>14</sub> | 577.156 | 578.162 | 6.51  | 8783   | 77.34 | Isorhoifolin                                              | [M-H] <sup>-</sup> |
| C <sub>28</sub> H <sub>30</sub> O <sub>12</sub> | 557.165 | 558.173 | 6.53  | 6822   | 90.27 | Physalin K                                                | [M-H] <sup>-</sup> |
| C <sub>25</sub> H <sub>24</sub> O <sub>13</sub> | 531.115 | 532.123 | 6.75  | 106330 | 93.55 | 2'',6''-Diacetylorientin                                  | [M-H] <sup>-</sup> |
| C <sub>26</sub> H <sub>24</sub> O <sub>13</sub> | 543.113 | 544.120 | 6.86  | 14752  | 92.54 | Maclurin 3-C-(6''-p-hydroxybenzoyl-glucoside)             | [M-H] <sup>-</sup> |
| C <sub>15</sub> H <sub>10</sub> O <sub>4</sub>  | 253.051 | 254.059 | 6.86  | 21428  | 80.47 | Apigenin                                                  | [M-H] <sup>-</sup> |
| C <sub>22</sub> H <sub>22</sub> O <sub>11</sub> | 461.110 | 462.117 | 7.18  | 102038 | 84.27 | Peonidin 3-galactoside                                    | [M-H] <sup>-</sup> |
| C <sub>16</sub> H <sub>12</sub> O <sub>5</sub>  | 283.063 | 284.268 | 7.33  | 6210   | 95.18 | Echioidinin                                               | [M-H] <sup>-</sup> |
| C <sub>16</sub> H <sub>12</sub> O <sub>5</sub>  | 283.063 | 284.266 | 7.96  | 85845  | 88.07 | Oroxylin A                                                | [M-H] <sup>-</sup> |
| C <sub>16</sub> H <sub>12</sub> O <sub>5</sub>  | 283.063 | 284.268 | 8.36  | 7577   | 80.48 | Wogonin                                                   | [M-H] <sup>-</sup> |
| C <sub>17</sub> H <sub>14</sub> O <sub>6</sub>  | 313.073 | 314.291 | 8.56  | 3740   | 75.86 | 3,5-Dihydroxy-7,8-dimethoxyflavone                        | [M-H] <sup>-</sup> |
| C <sub>17</sub> H <sub>14</sub> O <sub>6</sub>  | 313.073 | 314.291 | 10.65 | 24355  | 82.89 | Skullcapflavone I                                         | [M-H] <sup>-</sup> |
| C <sub>16</sub> H <sub>12</sub> O <sub>5</sub>  | 283.062 | 284.266 | 11.11 | 67233  | 91.27 | 7,2'-Dihydroxy-5-methoxyflavone                           | [M-H] <sup>-</sup> |

**Table S2.** Compounds identified by UPLC-QTOF-MS (HRMS) analysis in methanolic extract of *A. paniculata*.

| General                                         |            |          |      |        |       | Compound Identification                                      | Species/ Adduct    |
|-------------------------------------------------|------------|----------|------|--------|-------|--------------------------------------------------------------|--------------------|
| Formula                                         | <i>m/z</i> | Mass     | RT   | Height | Score | Name                                                         |                    |
| C <sub>20</sub> H <sub>28</sub> O <sub>6</sub>  | 363.430    | 364.438  | 0.68 | 13905  | 80.57 | Andrographic acid                                            | [M-H] <sup>-</sup> |
| C <sub>17</sub> H <sub>16</sub> O <sub>6</sub>  | 315.082    | 316.09   | 0.91 | 12662  | 77.28 | (2S)-5,2'-dihydroxy-7,8-dimethoxyflavanone                   | [M-H] <sup>-</sup> |
| C <sub>18</sub> H <sub>16</sub> O <sub>8</sub>  | 359.076    | 360.084  | 1.69 | 451509 | 92.66 | Rosmarinic acid                                              | [M-H] <sup>-</sup> |
| C <sub>23</sub> H <sub>24</sub> O <sub>12</sub> | 491.121    | 492.128  | 3.81 | 18922  | 79.45 | Andrographidine B                                            | [M-H] <sup>-</sup> |
| C <sub>26</sub> H <sub>42</sub> O <sub>12</sub> | 511.543    | 512.6215 | 3.95 | 22746  | 74.5  | Andrographiside                                              | [M-H] <sup>-</sup> |
| C <sub>16</sub> H <sub>24</sub> NO <sub>5</sub> | 299.092    | 300.321  | 4.25 | 15689  | 75.95 | Onysilin                                                     | [M-H] <sup>-</sup> |
| C <sub>20</sub> H <sub>30</sub> O <sub>5</sub>  | 349.203    | 350.210  | 4.38 | 155834 | 92.41 | Andropanolide                                                | [M-H] <sup>-</sup> |
| C <sub>25</sub> H <sub>28</sub> O <sub>13</sub> | 535.451    | 536.482  | 4.39 | 130370 | 95.97 | Andrographidine F                                            | [M-H] <sup>-</sup> |
| C <sub>25</sub> H <sub>24</sub> O <sub>12</sub> | 515.120    | 516.128  | 4.42 | 205579 | 96.1  | 1,3-Dicaffeoylquinic acid                                    | [M-H] <sup>-</sup> |
| C <sub>23</sub> H <sub>25</sub> O <sub>11</sub> | 476.131    | 477.139  | 4.53 | 88481  | 84.67 | 7,8-Dimethoxy-2'-hydroxy-5-O-β-D-glucopyranosyloxyflavone    | [M-H] <sup>-</sup> |
| C <sub>21</sub> H <sub>18</sub> O <sub>11</sub> | 445.079    | 446.086  | 4.61 | 215410 | 94.6  | Apigenin 7-O-β-glucuronide                                   | [M-H] <sup>-</sup> |
| C <sub>26</sub> H <sub>40</sub> O <sub>10</sub> | 511.261    | 512.262  | 4.71 | 133661 | 92.86 | Andrographiside                                              | [M-H] <sup>-</sup> |
| C <sub>16</sub> H <sub>18</sub> O <sub>9</sub>  | 353.089    | 354.096  | 4.74 | 37153  | 91.31 | Chlorogenic acid                                             | [M-H] <sup>-</sup> |
| C <sub>22</sub> H <sub>22</sub> O <sub>11</sub> | 461.110    | 462.118  | 4.78 | 8404   | 72.82 | 5,2',6'-trihydroxy-7-methoxyflavone 2'-O-β-D-glucopyrdnoside | [M-H] <sup>-</sup> |
| C <sub>26</sub> H <sub>40</sub> O <sub>8</sub>  | 479.653    | 480.653  | 4.84 | 197830 | 92.17 | 3-O-β-D-glucopyranosyl-14,19-dideoxyandrographolide          | [M-H] <sup>-</sup> |
| C <sub>22</sub> H <sub>22</sub> O <sub>10</sub> | 445.400    | 446.408  | 5.03 | 79466  | 89.45 | Isoswertisin                                                 | [M-H] <sup>-</sup> |
| C <sub>22</sub> H <sub>22</sub> O <sub>11</sub> | 461.110    | 462.117  | 5.08 | 46906  | 75.91 | Scutellarin-6-O-β-D-glucoside-7-methyl ether                 | [M-H] <sup>-</sup> |
| C <sub>20</sub> H <sub>28</sub> O <sub>4</sub>  | 331.193    | 332.200  | 5.23 | 91660  | 76.77 | Deoxy-didehydroandrographolide                               | [M-H] <sup>-</sup> |
| C <sub>22</sub> H <sub>22</sub> O <sub>11</sub> | 461.108    | 462.116  | 5.24 | 95963  | 93.89 | Scutellarin-6-O-β-D-glucoside-7-methyl ether                 | [M-H] <sup>-</sup> |
| C <sub>22</sub> H <sub>22</sub> O <sub>10</sub> | 445.114    | 446.122  | 5.26 | 11952  | 79.2  | Isoswertisin                                                 | [M-H] <sup>-</sup> |
| C <sub>26</sub> H <sub>40</sub> O <sub>10</sub> | 511.252    | 512.261  | 5.39 | 9527   | 76.81 | 3-O-β-D-glucopyranosyl andrographolide                       | [M-H] <sup>-</sup> |
| C <sub>26</sub> H <sub>40</sub> O <sub>9</sub>  | 495.262    | 496.273  | 5.5  | 59614  | 80.49 | 3-O-β-D-glucosyl-14-deoxyandrographolide                     | [M-H] <sup>-</sup> |
| C <sub>20</sub> H <sub>32</sub> O <sub>6</sub>  | 367.214    | 368.221  | 5.62 | 93418  | 90.4  | Andrographolic acid                                          | [M-H] <sup>-</sup> |
| C <sub>21</sub> H <sub>20</sub> O <sub>10</sub> | 431.097    | 432.105  | 5.63 | 26788  | 87.72 | 5,4'-Dihydroxy-7-methoxy-8-O-β-D-glucopyranosyloxyflavone    | [M-H] <sup>-</sup> |
| C <sub>25</sub> H <sub>24</sub> O <sub>12</sub> | 515.120    | 516.128  | 5.7  | 25155  | 93.26 | 3,4-Dicaffeoylquinic acid                                    | [M-H] <sup>-</sup> |
| C <sub>27</sub> H <sub>28</sub> O <sub>12</sub> | 543.508    | 544.509  | 5.71 | 5238   | 75.88 | Methyl-3,4-dicaffeoylquinic acid                             | [M-H] <sup>-</sup> |
| C <sub>20</sub> H <sub>28</sub> O <sub>5</sub>  | 347.187    | 348.194  | 5.92 | 54449  | 78.19 | Deoxy-oxoandrographolide                                     | [M-H] <sup>-</sup> |
| C <sub>23</sub> H <sub>24</sub> O <sub>11</sub> | 475.126    | 476.134  | 6.08 | 47182  | 79.87 | Andrographidine D                                            | [M-H] <sup>-</sup> |
| C <sub>19</sub> H <sub>26</sub> O <sub>4</sub>  | 317.176    | 318.184  | 6.17 | 11366  | 78.14 | 14-deoxy-11,12-dihydroandrographolide                        | [M-H] <sup>-</sup> |
| C <sub>23</sub> H <sub>24</sub> O <sub>11</sub> | 475.126    | 476.133  | 6.20 | 90020  | 91.24 | Andropaniculoside A                                          | [M-H] <sup>-</sup> |
| C <sub>20</sub> H <sub>30</sub> O <sub>5</sub>  | 349.203    | 350.210  | 6.29 | 227466 | 96.25 | Andrographolide                                              | [M-H] <sup>-</sup> |

|                                                |         |          |       |        |       |                                         |                    |
|------------------------------------------------|---------|----------|-------|--------|-------|-----------------------------------------|--------------------|
| C <sub>18</sub> H <sub>16</sub> O <sub>6</sub> | 327.082 | 328.094  | 6.7   | 19122  | 84.01 | 5-hydroxy-2',7,8-trimethoxyflavone      | [M-H] <sup>-</sup> |
| C <sub>26</sub> H <sub>40</sub> O <sub>9</sub> | 495.260 | 496.2688 | 6.79  | 198832 | 92.7  | Ninandrographolide                      | [M-H] <sup>-</sup> |
| C <sub>20</sub> H <sub>28</sub> O <sub>4</sub> | 331.192 | 332.198  | 7.45  | 80862  | 77.78 | 14-deoxy-14,15-didehydroandrographolide | [M-H] <sup>-</sup> |
| C <sub>17</sub> H <sub>14</sub> O <sub>6</sub> | 313.290 | 314.293  | 8.45  | 4881   | 79.85 | Skullcapflavone I                       | [M-H] <sup>-</sup> |
| C <sub>21</sub> H <sub>32</sub> O <sub>5</sub> | 363.217 | 364.224  | 8.79  | 39050  | 93.95 | 14-deoxy-12-methoxyandrographolide      | [M-H] <sup>-</sup> |
| C <sub>26</sub> H <sub>32</sub> O <sub>8</sub> | 283.263 | 284.262  | 9.14  | 4902   | 76.2  | Oroxylin A                              | [M-H] <sup>-</sup> |
| C <sub>20</sub> H <sub>24</sub> O <sub>2</sub> | 295.420 | 296.421  | 9.19  | 1096   | 84.42 | Andrographolactone                      | [M-H] <sup>-</sup> |
| C <sub>19</sub> H <sub>28</sub> O <sub>6</sub> | 351.188 | 352.189  | 9.67  | 11524  | 78.39 | 7-Hydroxy-14-deoxyandrographolide       | [M-H] <sup>-</sup> |
| C <sub>18</sub> H <sub>18</sub> O <sub>5</sub> | 313.142 | 314.115  | 11.69 | 7749   | 73.11 | 5,7,8-Trimethoxydihydroflavone          | [M-H] <sup>-</sup> |
| C <sub>17</sub> H <sub>14</sub> O <sub>6</sub> | 313.282 | 314.290  | 12.95 | 12906  | 80.30 | Dihydroxydimethoxyflavone               | [M-H] <sup>-</sup> |
| C <sub>20</sub> H <sub>28</sub> O <sub>5</sub> | 347.429 | 348.430  | 17.99 | 4590   | 73.36 | Dehydroandrographoline                  | [M-H] <sup>-</sup> |

**Table S3.** *In-silico* PASS prediction activity of compounds identified from the methanolic extract of *A. nallampalayana*.

| Sr. No | Compound Name                                                                 | Pa*   | Pi*   | PASS Activity Prediction |
|--------|-------------------------------------------------------------------------------|-------|-------|--------------------------|
| 1      | Isorhamnetin 3-glucoside                                                      | 0.974 | 0.001 | Anticarcinogenic         |
| 2      | 3-p-Coumaroyl quinic acid                                                     | 0.961 | 0.001 | Antimutagenic            |
| 3      | 3,4-Di- <i>O</i> -caffeoylquinic acid                                         | 0.955 | 0.001 | Antimutagenic            |
| 4      | 2''- <i>O</i> -Vanilloylvitexin                                               | 0.949 | 0.002 | Chemopreventive          |
| 5      | Luteolin 4'-glucoside                                                         | 0.948 | 0.002 | Anticarcinogenic         |
| 6      | Scutellarein 7-methyl ether 6-galactoside                                     | 0.947 | 0.002 | Chemopreventive          |
| 7      | Hispidulin 7-glucoside                                                        | 0.943 | 0.002 | Chemopreventive          |
| 8      | Peonidin 3- <i>O</i> -galactoside                                             | 0.942 | 0.002 | Chemopreventive          |
| 9      | Wogonin                                                                       | 0.94  | 0.001 | Antimutagenic            |
| 10     | Luteolin 7-methyl ether 5- $\beta$ -D-glucoside                               | 0.924 | 0.002 | Anticarcinogenic         |
| 11     | 3,5-Dihydroxy-7,8-dimethoxyflavone                                            | 0.917 | 0.002 | Antimutagenic            |
| 12     | 1- <i>O</i> -caffeoylquinic acid                                              | 0.915 | 0.002 | Antimutagenic            |
| 13     | Neobignonoside                                                                | 0.91  | 0.002 | Anticarcinogenic         |
| 14     | 5,2',6'-Trihydroxy-7-methoxyflavone 2'- <i>O</i> - $\beta$ -D-glucopyranoside | 0.91  | 0.002 | Anticarcinogenic         |
| 15     | Echioidinin                                                                   | 0.907 | 0.002 | Antimutagenic            |
| 16     | 7,2'-Dihydroxy-5-methoxyflavone                                               | 0.906 | 0.002 | Antimutagenic            |
| 17     | Chrysin 7-glucuronide                                                         | 0.9   | 0.002 | Anticarcinogenic         |
| 18     | Skullcapflavone I                                                             | 0.896 | 0.002 | Antimutagenic            |
| 19     | Oroxylin A                                                                    | 0.881 | 0.002 | Antimutagenic            |
| 20     | Chlorogenic Acid                                                              | 0.846 | 0.004 | Anticarcinogenic         |

\*Pa: Probable activity, Pi: Probable inactivity



**Table S4.** *In-silico* CLC-Pred cell line cytotoxicity prediction of compounds identified from the methanolic extract of *A. nallampalayana*.

| Sr No | Identified Compound                                                           | Cell Line | Cell line full name        | Tissue                             | Tumor Type     | Pa*   | Pi*   |
|-------|-------------------------------------------------------------------------------|-----------|----------------------------|------------------------------------|----------------|-------|-------|
| 1     | Chlorogenic Acid                                                              | NCI-H838  | Non-small cell lung cancer | Lung                               | Carcinoma      | 0.601 | 0.02  |
|       |                                                                               | Hep G2    | Hepatoblastoma             | Liver                              | Hepatoblastoma | 0.569 | 0.016 |
|       |                                                                               | RKO       | Colon carcinoma            | Colon                              | Carcinoma      | 0.271 | 0.203 |
| 2     | 1- <i>O</i> -Caffeoylquinic acid                                              | NCI-H838  | Non-small cell lung cancer | Lung                               | Carcinoma      | 0.581 | 0.023 |
|       |                                                                               | Hep G2    | Hepatoblastoma             | Liver                              | Hepatoblastoma | 0.525 | 0.02  |
|       |                                                                               | RKO       | Colon carcinoma            | Colon                              | Carcinoma      | 0.273 | 0.198 |
| 3     | Isorhamnetin 3-glucoside                                                      | HL-60     | Promyeloblast leukaemia    | Haematopoietic and lymphoid tissue | Leukemia       | 0.538 | 0.023 |
|       |                                                                               | NCI-H838  | Non-small cell lung cancer | Lung                               | Carcinoma      | 0.488 | 0.057 |
|       |                                                                               | Caco-2    | Colon adenocarcinoma       | Colon                              | Adenocarcinoma | 0.465 | 0.005 |
| 4     | 3,4-di- <i>O</i> -caffeoylquinic acid                                         | NCI-H838  | Non-small cell lung cancer | Lung                               | Carcinoma      | 0.588 | 0.022 |
|       |                                                                               | Hep G2    | Hepatoblastoma             | Liver                              | Hepatoblastoma | 0.522 | 0.021 |
|       |                                                                               | LS174T    | Colon adenocarcinoma       | Colon                              | Adenocarcinoma | 0.22  | 0.173 |
| 5     | Hispidulin 7-glucoside (Homoplantaginin)                                      | Caco-2    | Colon adenocarcinoma       | Colon                              | Adenocarcinoma | 0.627 | 0.004 |
|       |                                                                               | NCI-H838  | Non-small cell lung cancer | Lung                               | Carcinoma      | 0.512 | 0.043 |
|       |                                                                               | Hep G2    | Hepatoblastoma             | Liver                              | Hepatoblastoma | 0.302 | 0.061 |
| 6     | Luteolin 4'-glucoside                                                         | Caco-2    | Colon adenocarcinoma       | Colon                              | Adenocarcinoma | 0.614 | 0.004 |
|       |                                                                               | NCI-H838  | Non-small cell lung cancer | Lung                               | Carcinoma      | 0.505 | 0.047 |
|       |                                                                               | Hep G2    | Hepatoblastoma             | Liver                              | Hepatoblastoma | 0.302 | 0.061 |
| 7     | Neobignonoside                                                                | HL-60     | Promyeloblast leukaemia    | Haematopoietic and lymphoid tissue | Leukemia       | 0.502 | 0.027 |
|       |                                                                               | NCI-H838  | Non-small cell lung cancer | Lung                               | Carcinoma      | 0.478 | 0.064 |
|       |                                                                               | Caco-2    | Colon adenocarcinoma       | Colon                              | Adenocarcinoma | 0.435 | 0.006 |
| 8     | 5,2',6'-Trihydroxy-7-methoxyflavone 2'- <i>O</i> - $\beta$ -D-glucopyranoside | HL-60     | Promyeloblast leukaemia    | Haematopoietic and lymphoid tissue | Leukemia       | 0.622 | 0.015 |
|       |                                                                               | NCI-H838  | Non-small cell lung cancer | Lung                               | Carcinoma      | 0.505 | 0.047 |
|       |                                                                               | Caco-2    | Colon adenocarcinoma       | Colon                              | Adenocarcinoma | 0.501 | 0.005 |
| 9     | Luteolin 7-methyl ether 5- $\beta$ -D-glucoside                               | NCI-H838  | Non-small cell lung cancer | Lung                               | Carcinoma      | 0.504 | 0.047 |
|       |                                                                               | Caco-2    | Colon adenocarcinoma       | Colon                              | Adenocarcinoma | 0.5   | 0.005 |
|       |                                                                               | Hep G2    | Hepatoblastoma             | Liver                              | Hepatoblastoma | 0.332 | 0.053 |
| 10    | 3- <i>p</i> -coumaroyl quinic acid                                            | NCI-H838  | Non-small cell lung cancer | Lung                               | Carcinoma      | 0.562 | 0.026 |
|       |                                                                               | Hep G2    | Hepatoblastoma             | Liver                              | Hepatoblastoma | 0.52  | 0.021 |
|       |                                                                               | SK-MEL-1  | Metastatic melanoma        | Skin                               | Melanoma       | 0.467 | 0.045 |
| 11    | Scutellarein 7-methyl ether 6-                                                | NCI-H838  | Non-small cell lung cancer | Lung                               | Carcinoma      | 0.53  | 0.035 |

|    |                                    |          |                               |                                    |                |       |       |
|----|------------------------------------|----------|-------------------------------|------------------------------------|----------------|-------|-------|
|    | galactoside                        | Caco-2   | Colon adenocarcinoma          | Colon                              | Adenocarcinoma | 0.497 | 0.005 |
|    |                                    | Hep G2   | Hepatoblastoma                | Liver                              | Hepatoblastoma | 0.343 | 0.051 |
| 12 | 2''-O-Vanilloylvitexin             | NCI-H838 | Non-small cell lung cancer    | Lung                               | Carcinoma      | 0.51  | 0.044 |
|    |                                    | SK-MEL-1 | Metastatic melanoma           | Skin                               | Melanoma       | 0.416 | 0.085 |
|    |                                    | Caco-2   | Colon adenocarcinoma          | Colon                              | Adenocarcinoma | 0.293 | 0.019 |
| 13 | Chrysin 7-glucuronide              | NCI-H838 | Non-small cell lung cancer    | Lung                               | Carcinoma      | 0.602 | 0.02  |
|    |                                    | SK-MEL-1 | Metastatic melanoma           | Skin                               | Melanoma       | 0.447 | 0.057 |
|    |                                    | Hep G2   | Hepatoblastoma                | Liver                              | Hepatoblastoma | 0.427 | 0.033 |
| 14 | Peonidin 3-galactoside             | NCI-H838 | Non-small cell lung cancer    | Lung                               | Carcinoma      | 0.525 | 0.038 |
|    |                                    | HL-60    | Promyeloblast leukaemia       | Haematopoietic and lymphoid tissue | Leukemia       | 0.519 | 0.025 |
|    |                                    | Caco-2   | Colon adenocarcinoma          | Colon                              | Adenocarcinoma | 0.359 | 0.011 |
| 15 | Echioidinin                        | NCI-H187 | Small cell lung carcinoma     | Lung                               | Carcinoma      | 0.407 | 0.065 |
|    |                                    | COLO 320 | Colon adenocarcinoma          | Colon                              | Adenocarcinoma | 0.334 | 0.003 |
|    |                                    | Hep G2   | Hepatoblastoma                | Liver                              | Hepatoblastoma | 0.294 | 0.063 |
| 16 | Oroxylin A                         | NCI-H187 | Small cell lung carcinoma     | Lung                               | Carcinoma      | 0.452 | 0.032 |
|    |                                    | Hep G2   | Hepatoblastoma                | Liver                              | Hepatoblastoma | 0.409 | 0.037 |
|    |                                    | COLO 320 | Colon adenocarcinoma          | Colon                              | Adenocarcinoma | 0.39  | 0.002 |
| 17 | Wogonin                            | HOP-18   | Non-small cell lung carcinoma | Lung                               | Carcinoma      | 0.426 | 0.023 |
|    |                                    | LS174T   | Colon adenocarcinoma          | Colon                              | Adenocarcinoma | 0.302 | 0.033 |
|    |                                    | Hep G2   | Hepatoblastoma                | Liver                              | Hepatoblastoma | 0.192 | 0.112 |
| 18 | 3,5-Dihydroxy-7,8-dimethoxyflavone | Hs 683   | Oligodendroglioma             | Brain                              | Glioma         | 0.408 | 0.111 |
|    |                                    | HOP-18   | Non-small cell lung carcinoma | Lung                               | Carcinoma      | 0.321 | 0.063 |
|    |                                    | COLO 320 | Colon adenocarcinoma          | Colon                              | Adenocarcinoma | 0.315 | 0.003 |
| 19 | Skullcapflavone I                  | PC-6     | Small cell lung carcinoma     | Lung                               | Carcinoma      | 0.404 | 0.04  |
|    |                                    | Hep G2   | Hepatoblastoma                | Liver                              | Hepatoblastoma | 0.386 | 0.042 |
|    |                                    | LS174T   | Colon adenocarcinoma          | Colon                              | Adenocarcinoma | 0.337 | 0.016 |
| 20 | 7,2'-Dihydroxy-5-methoxyflavone    | NCI-H187 | Small cell lung carcinoma     | Lung                               | Carcinoma      | 0.449 | 0.033 |
|    |                                    | COLO 320 | Colon adenocarcinoma          | Colon                              | Adenocarcinoma | 0.408 | 0.002 |
|    |                                    | Hep G2   | Hepatoblastoma                | Liver                              | Hepatoblastoma | 0.404 | 0.038 |

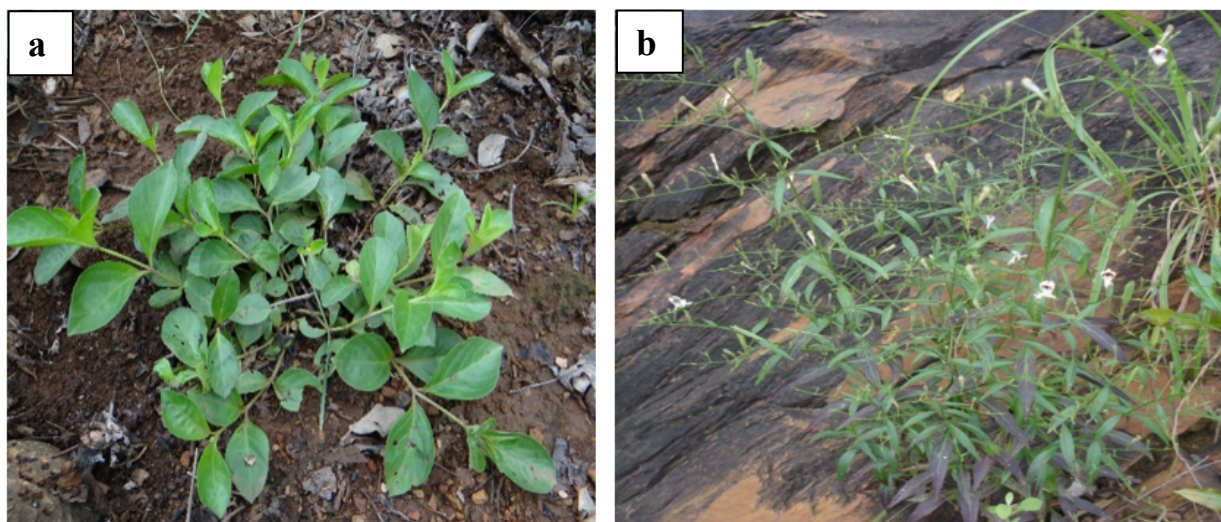

**Figure S1.** Parts of studied *Andrographis* species **a)** Leaves of *Andrographis nallamalayana*; **b)** Leaves of *Andrographis paniculata*.

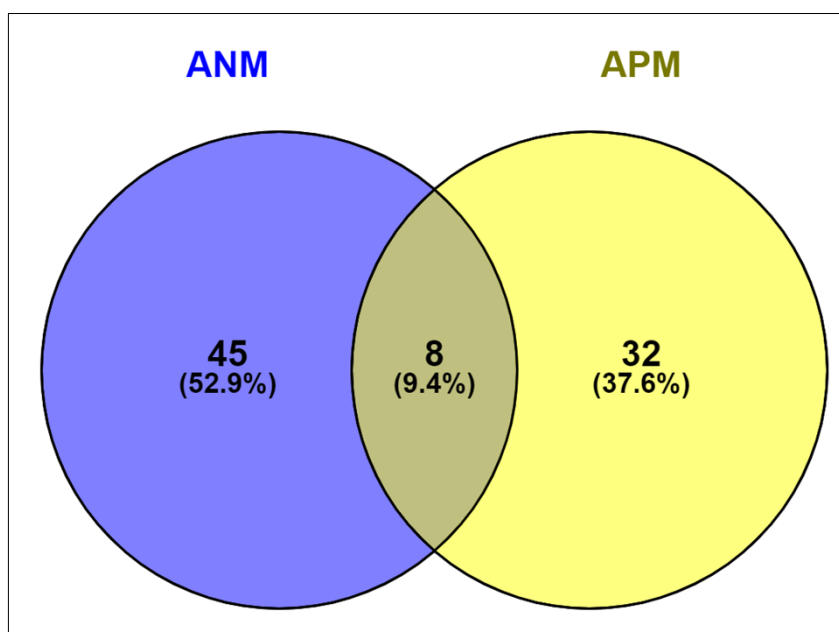

**Figure S2.** Venn diagram for comparison of chemical constituents commonly present in both *Andrographis* species. **ANM)** *Andrographis nallamalayana* methanol extract; **APM)** *Andrographis paniculata* methanol extract.

## MS/MS spectra of the identified compounds

### 1. MS/MS Spectra of Chlorogenic Acid

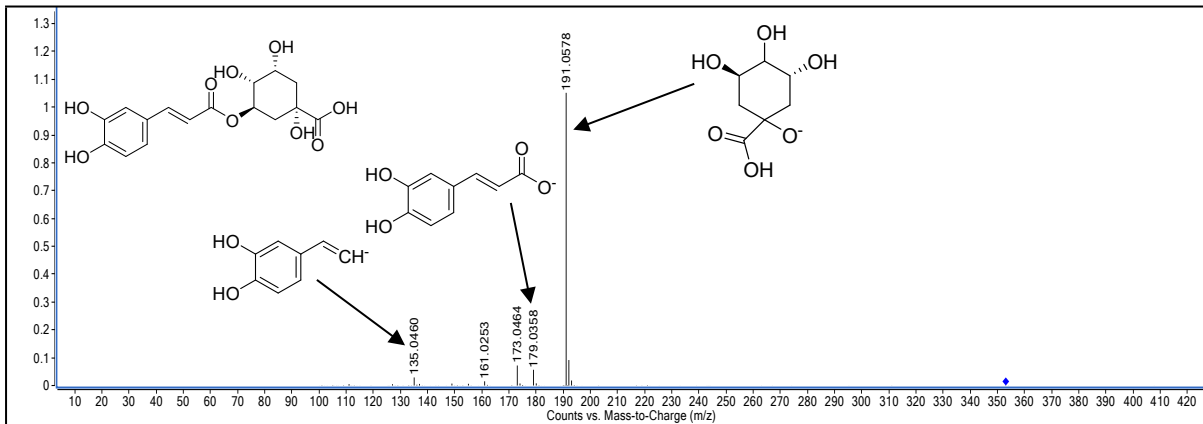

### 2. MS/MS Spectra of 1-O-Caffeoylquinic acid

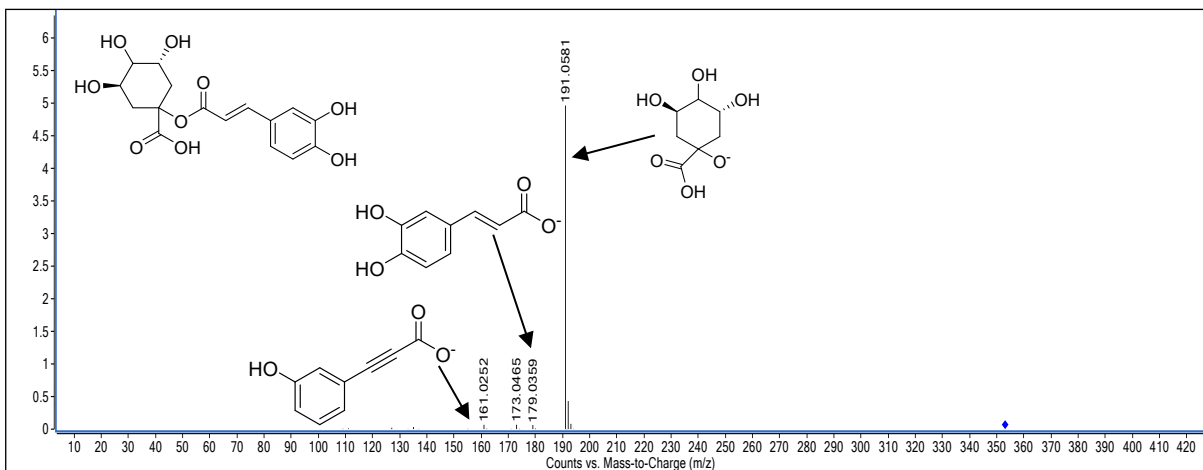

### 3. MS/MS Spectra of Isorhamnetin 3-glucoside

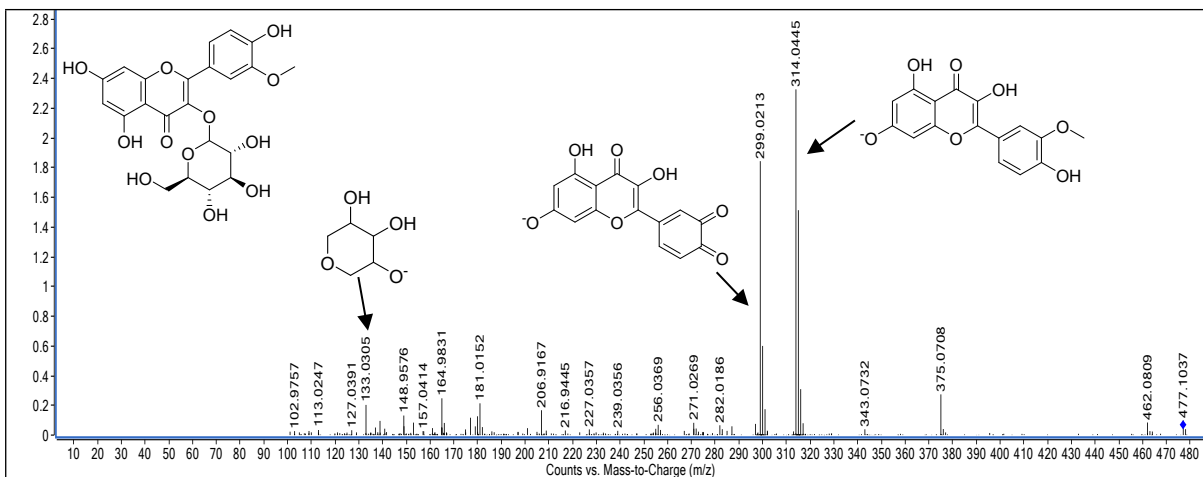

#### 4. MS/MS Spectra of 3,4-Di-O-caffeoylquinic acid

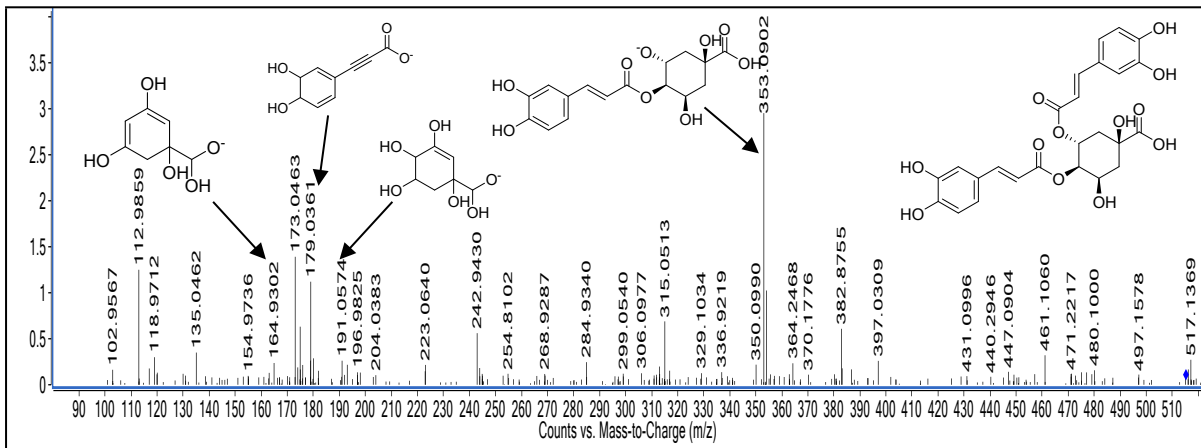

#### 5. MS/MS Spectra of Hispidulin 7-glucoside

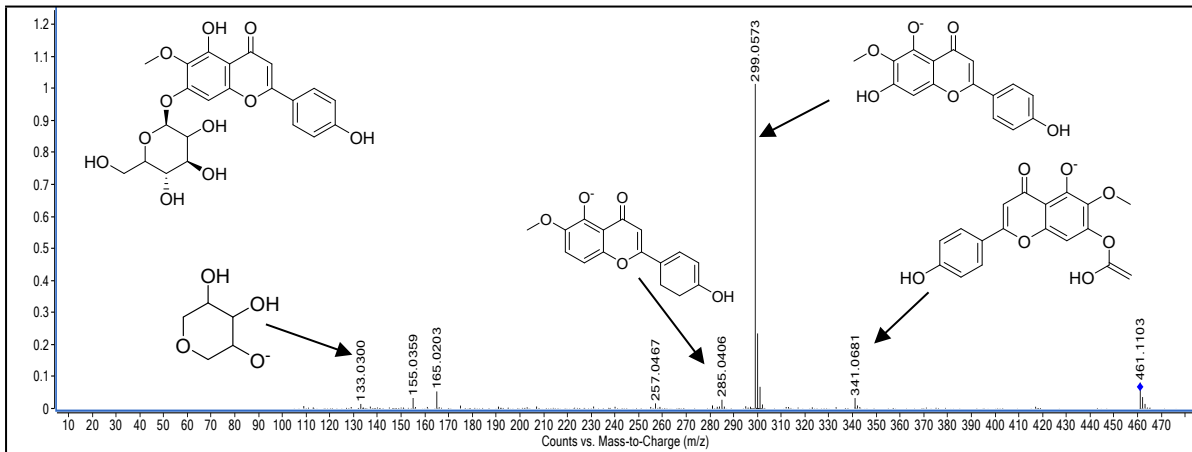

#### 6. MS/MS Spectra of Luteolin 4'-glucoside

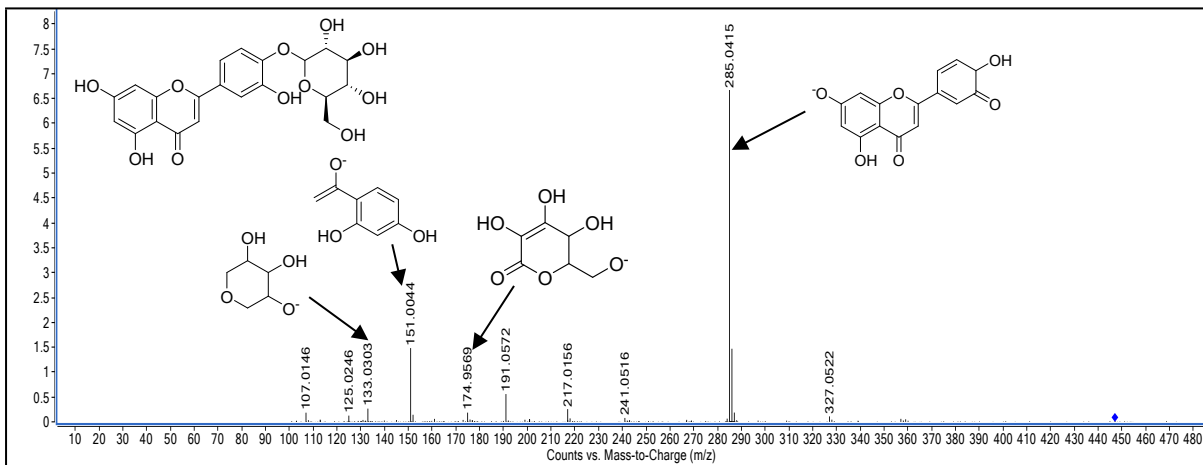

## 7. MS/MS Spectra of Neobignonoside

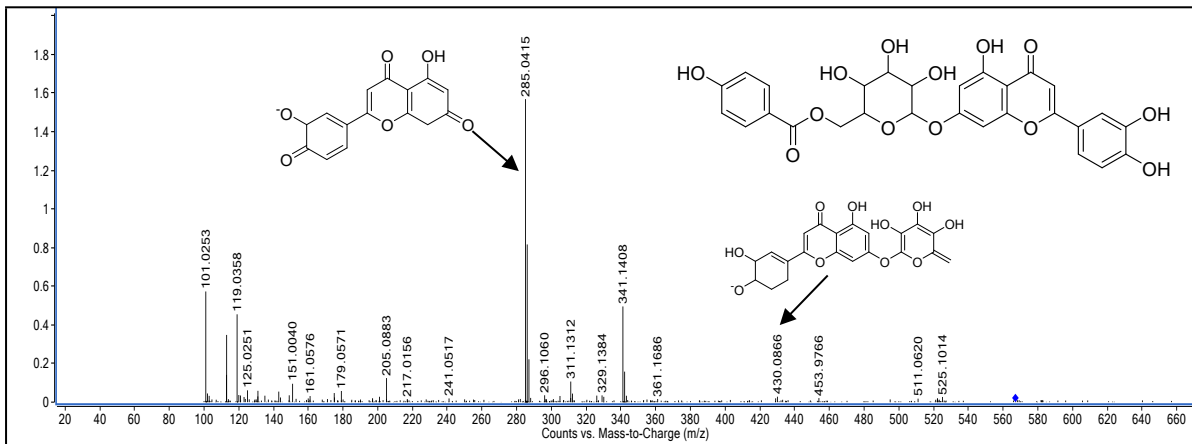

## 8. MS/MS Spectra of 5,2',6'-trihydroxy-7-methoxyflavone 2'-O-β-D-glucopyranoside

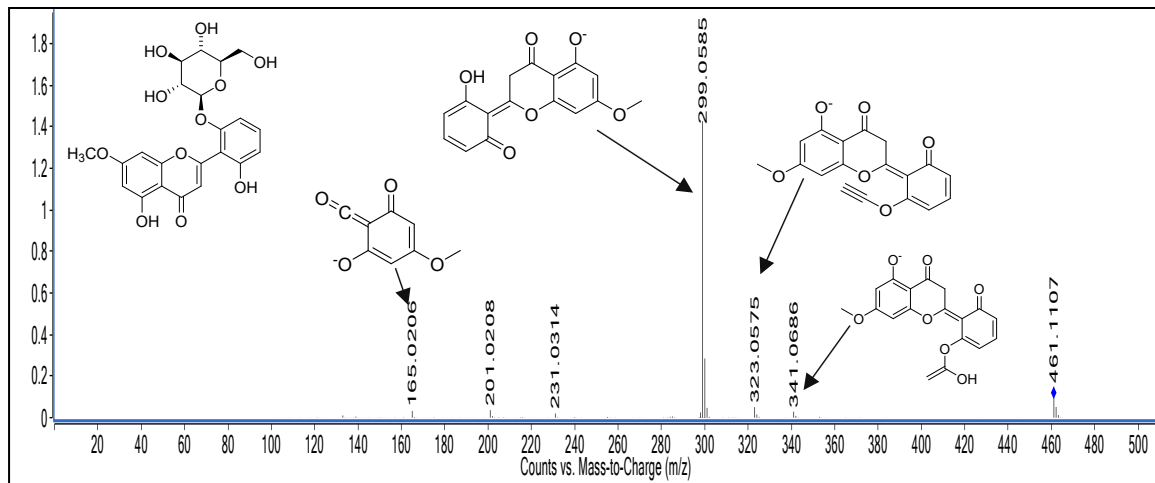

## 9. MS/MS Spectra of Luteolin 7-methyl ether 5-glucoside

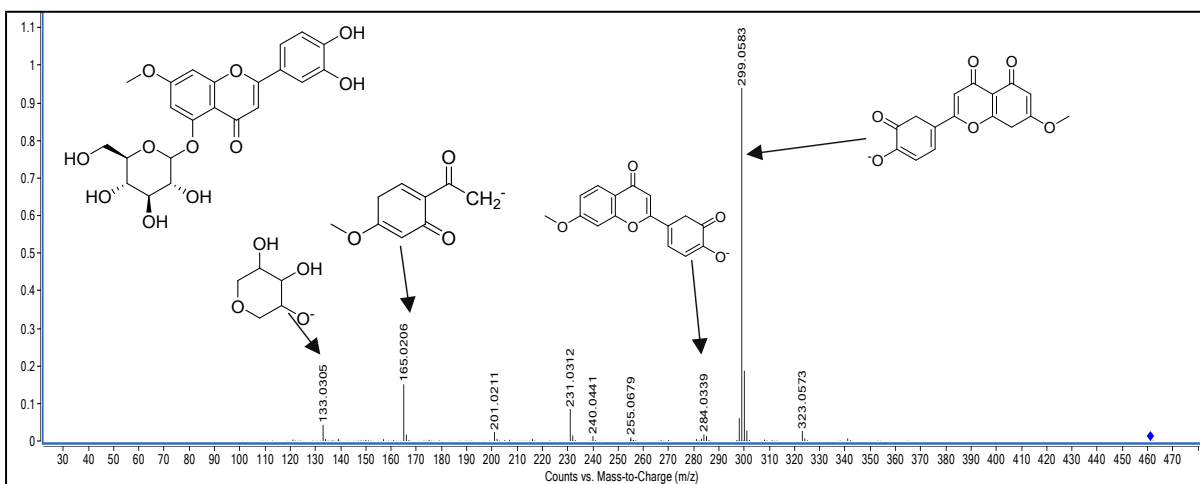

## 10. MS/MS Spectra of 3-p-coumaroyl quinic acid

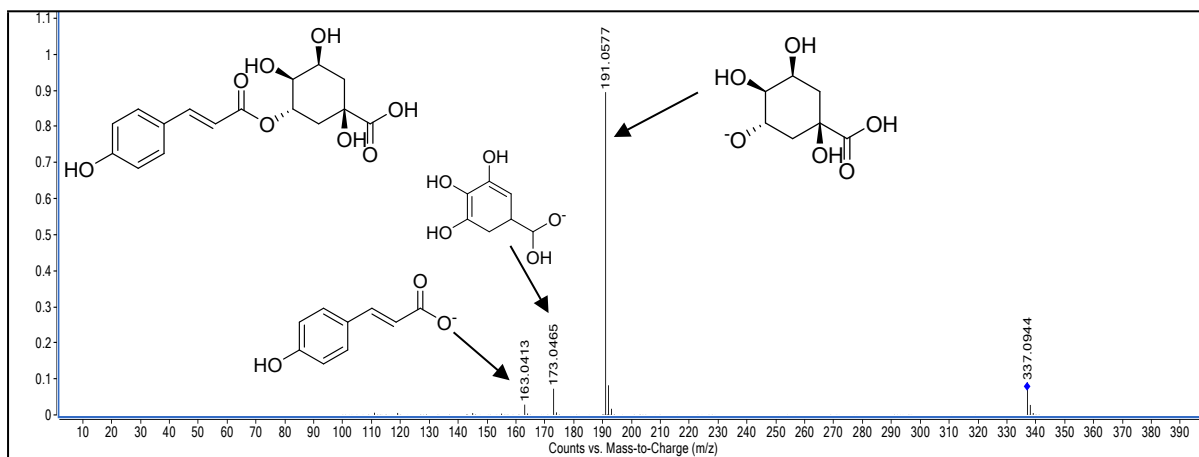

## 11. MS/MS Spectra of Scutellarein 7-methyl ether 6-galactoside

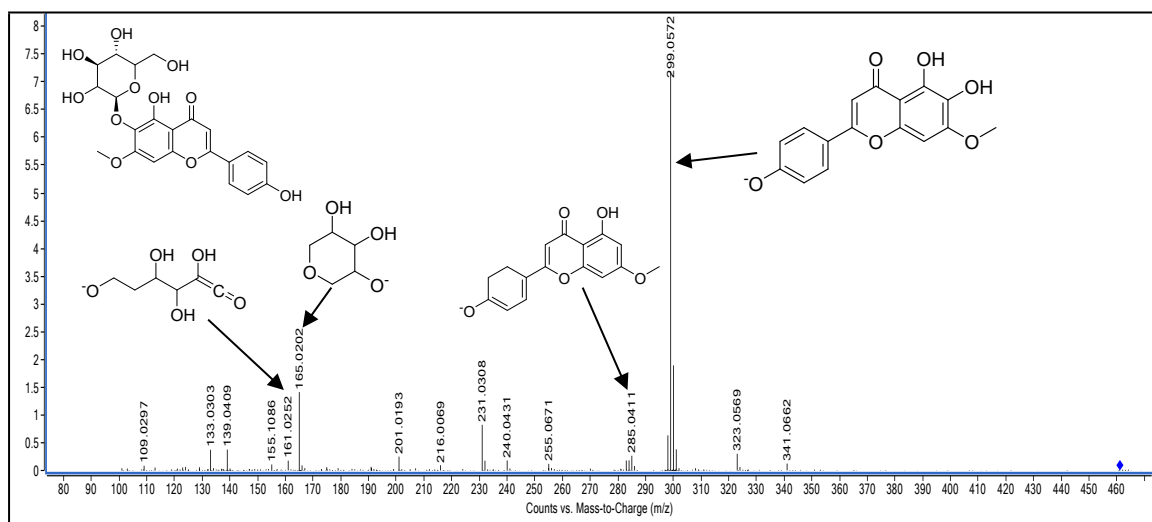

## 12. MS/MS Spectra of 2''-O-vanilloylvitexin

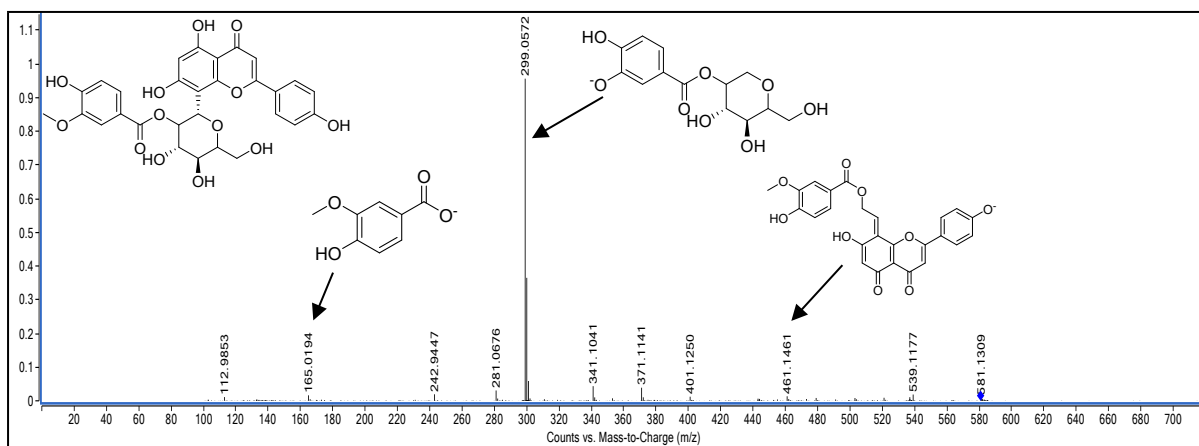

### 13. MS/MS Spectra of Chrysin 7-glucuronide

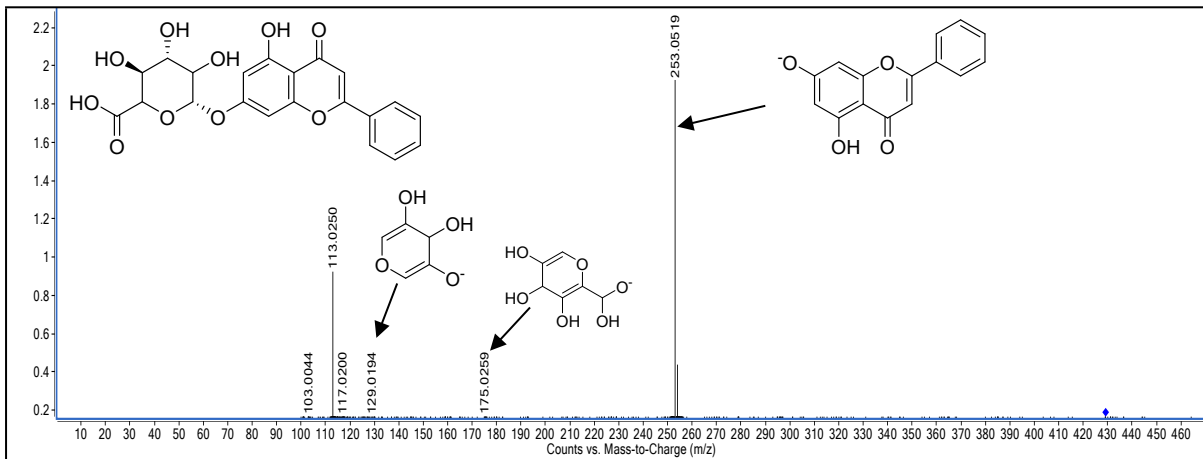

### 14. MS/MS Spectra of Peonidin 3-O-galactoside

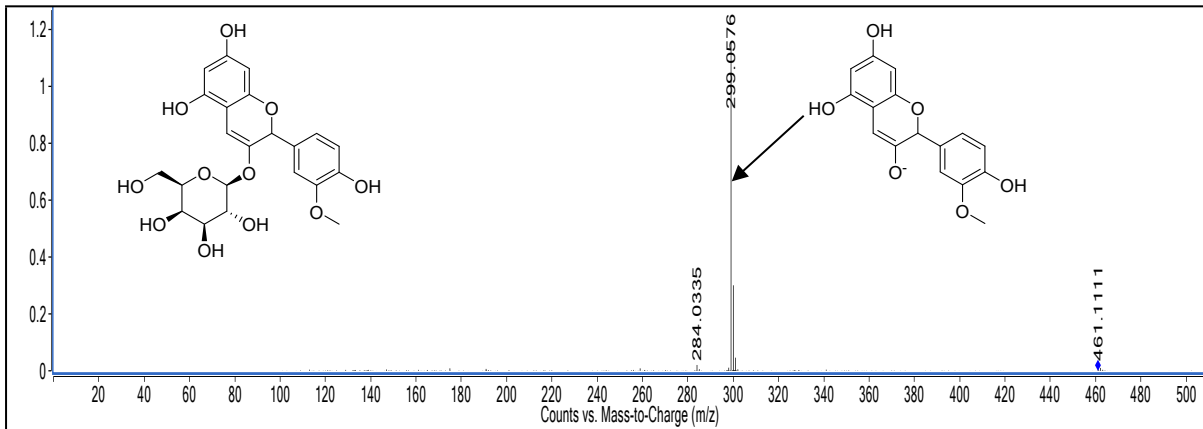

### 15. MS/MS Spectra of Echioidinin

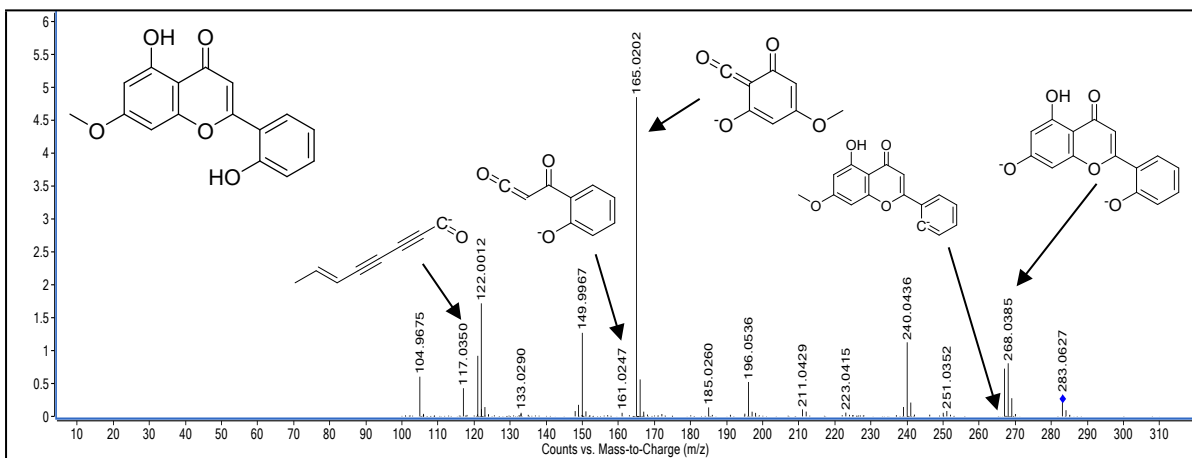



## 16. MS/MS Spectra of Oroxylin A

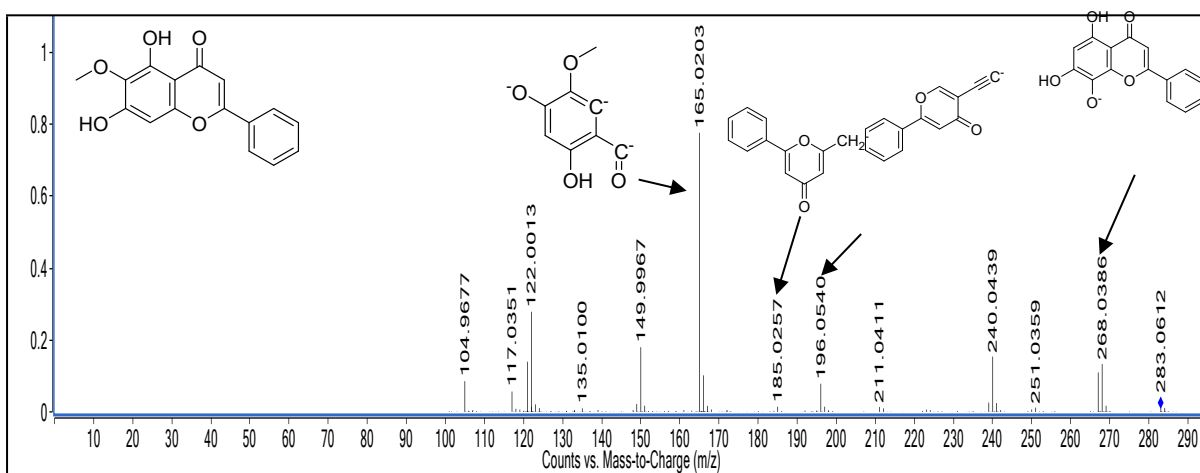

## 17. MS/MS Spectra of Wogonin

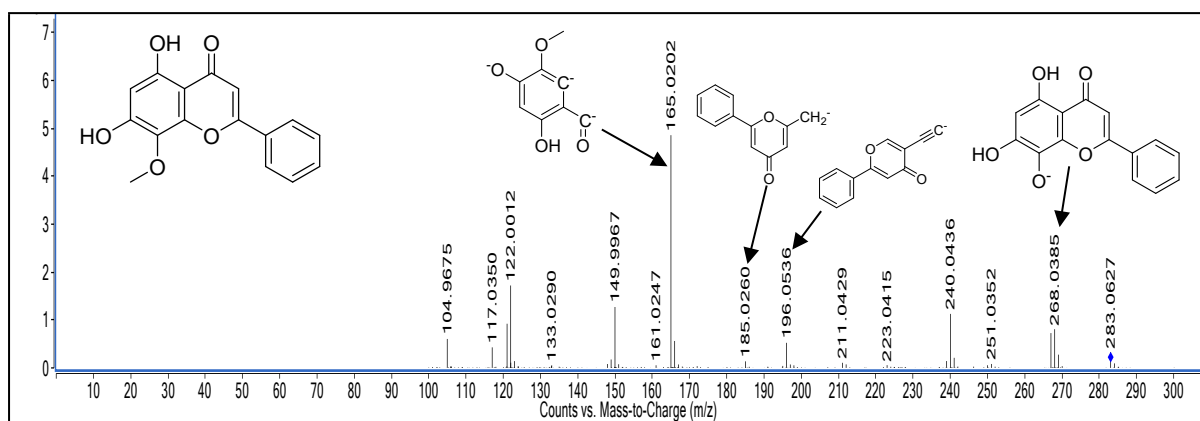

## 18. MS/MS Spectra of 3,5-Dihydroxy-7,8-dimethoxyflavone

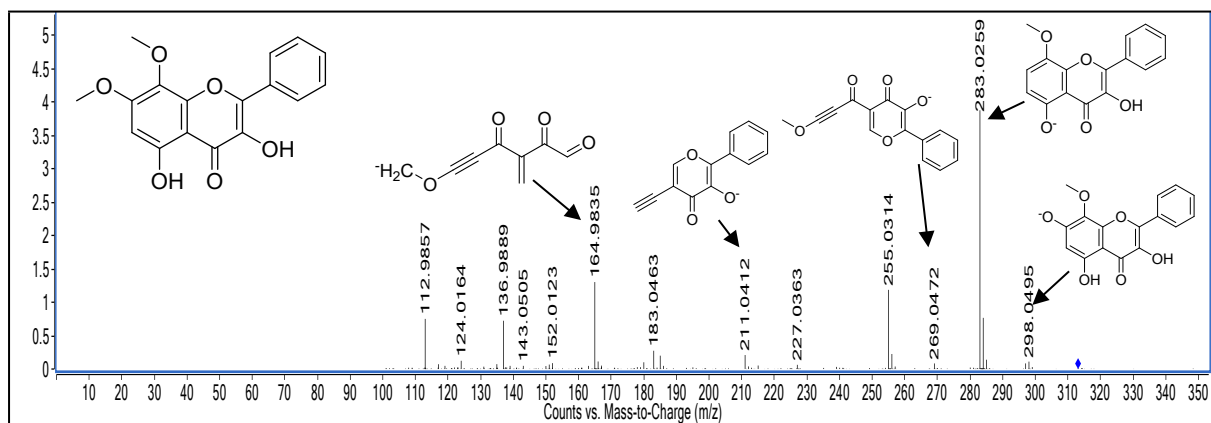

## 19. MS/MS Spectra of Skullcapflavone I

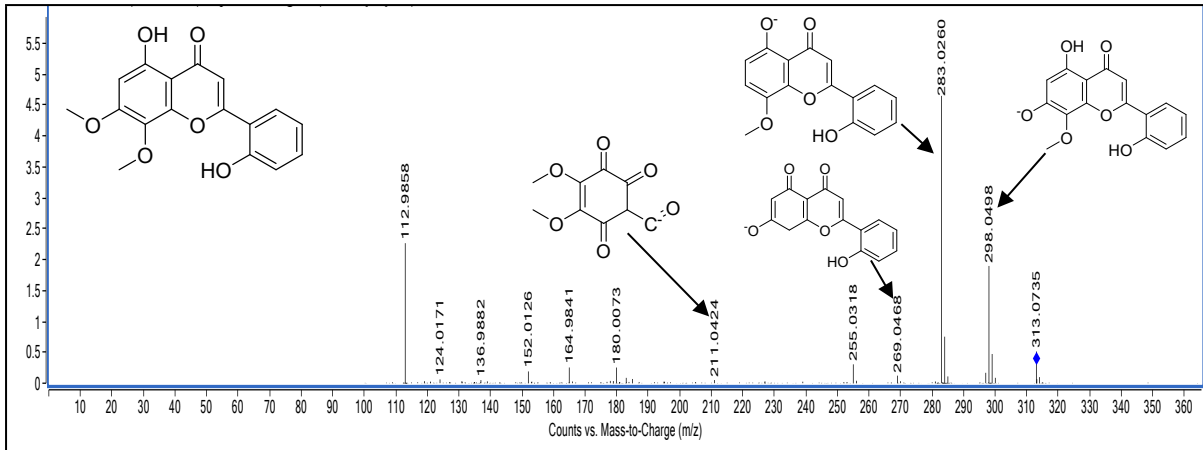

## 20. MS/MS Spectra of 7,2'-Dihydroxy-5-methoxyflavone

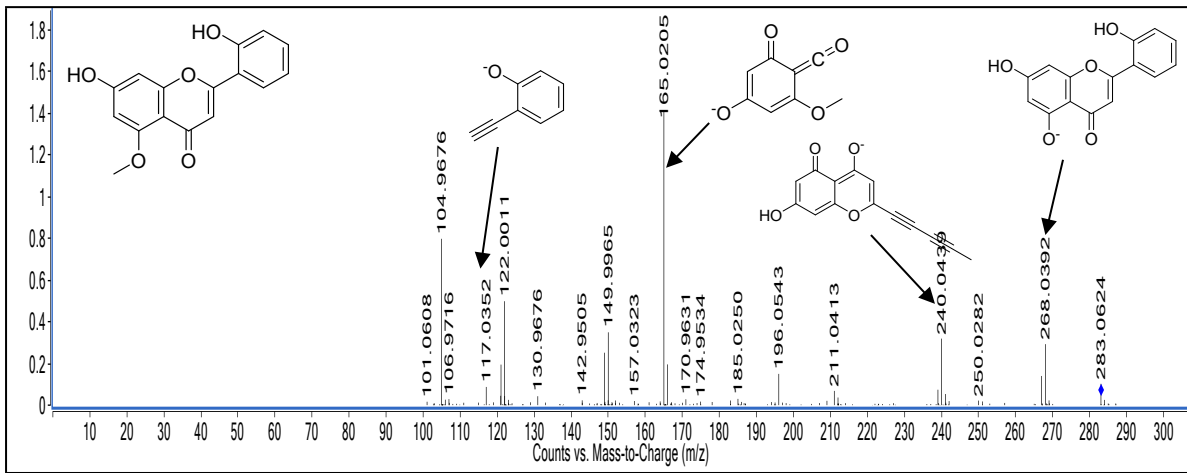

**Figure S3.** MS/MS fragmentation spectra of the identified compounds from the methanolic extract of *A. nallamalayana*.

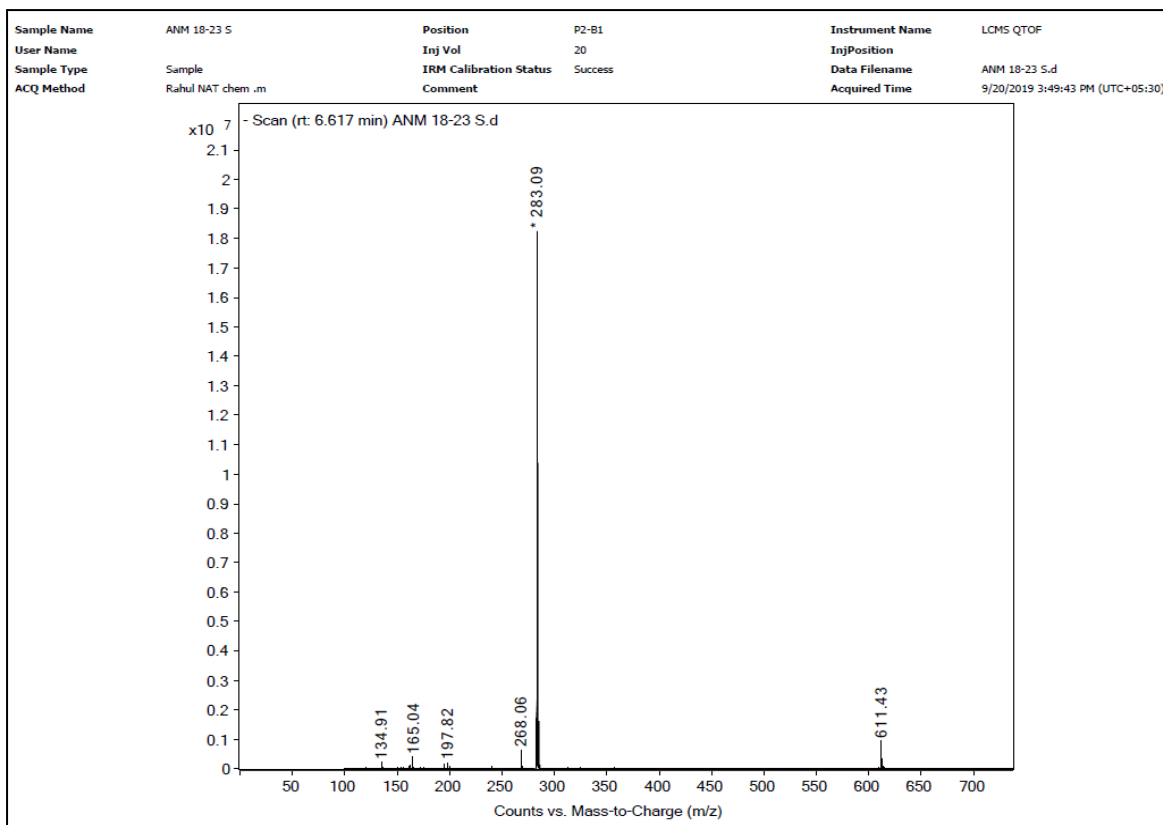

**Figure S4.** HRMS spectra of **Compound 1**.

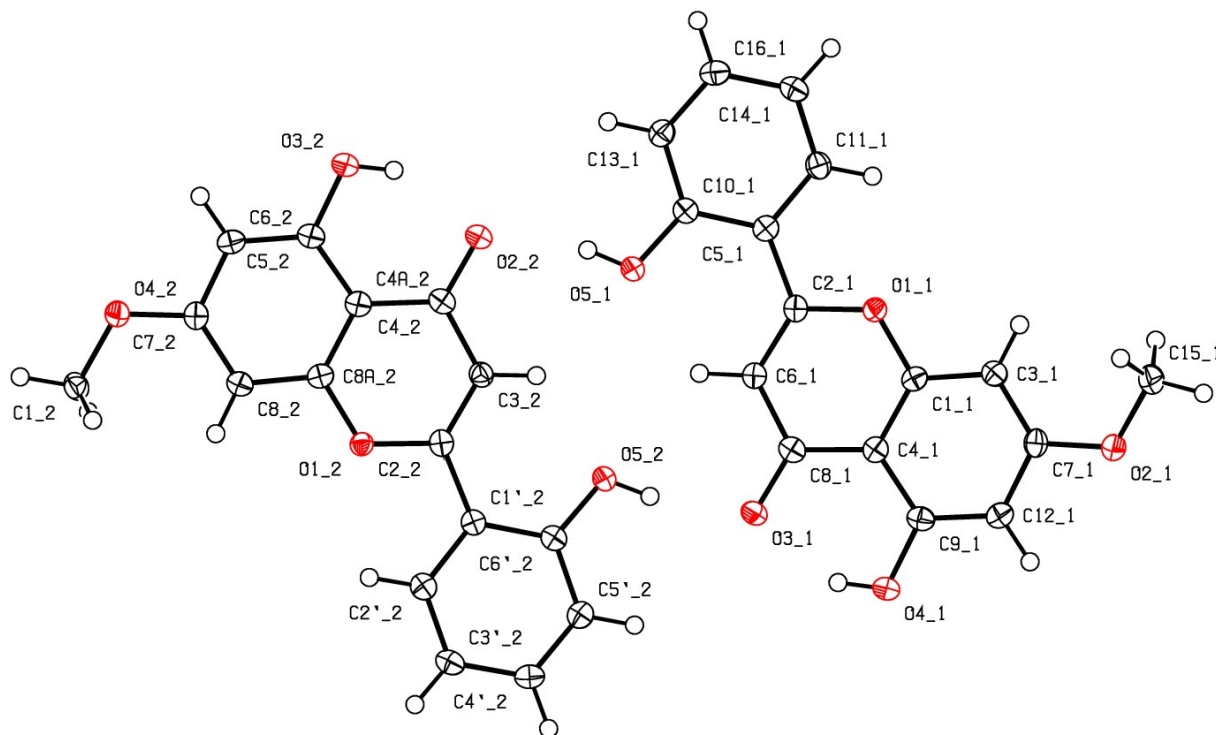

**Figure S5.** Thermal ellipsoid plot of **Compound 1** (CCDC No: 2072153). Ellipsoids are represented with 50% probability.

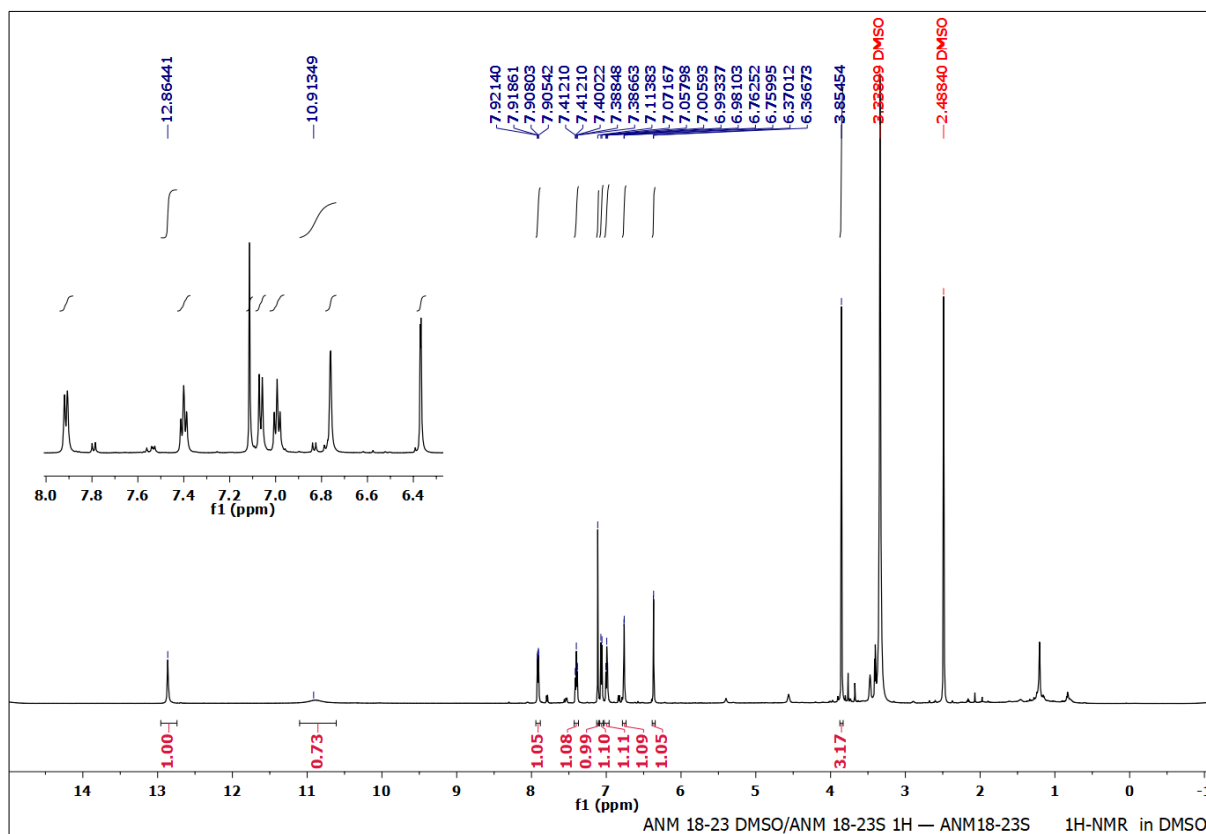

Figure S6. <sup>1</sup>H NMR of Compound 1.

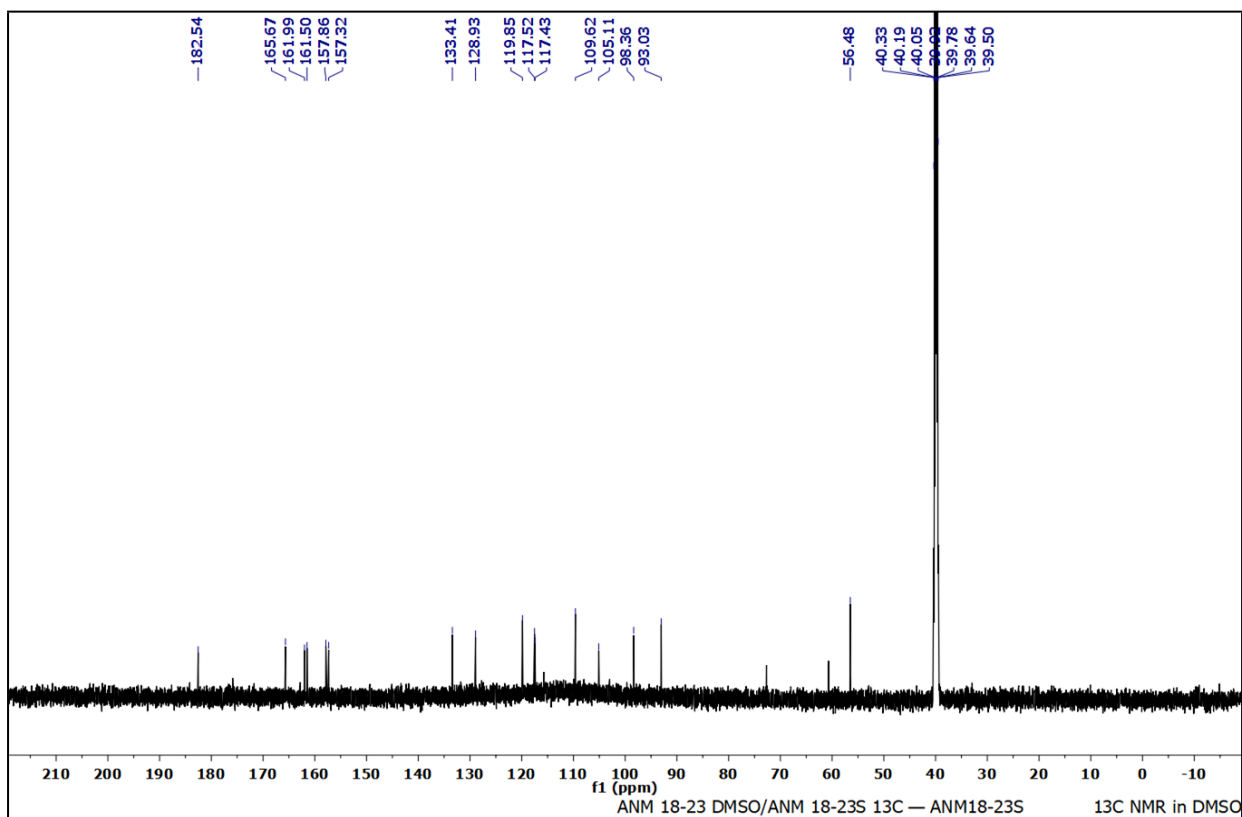

Figure S7. <sup>13</sup>C NMR of Compound 1.

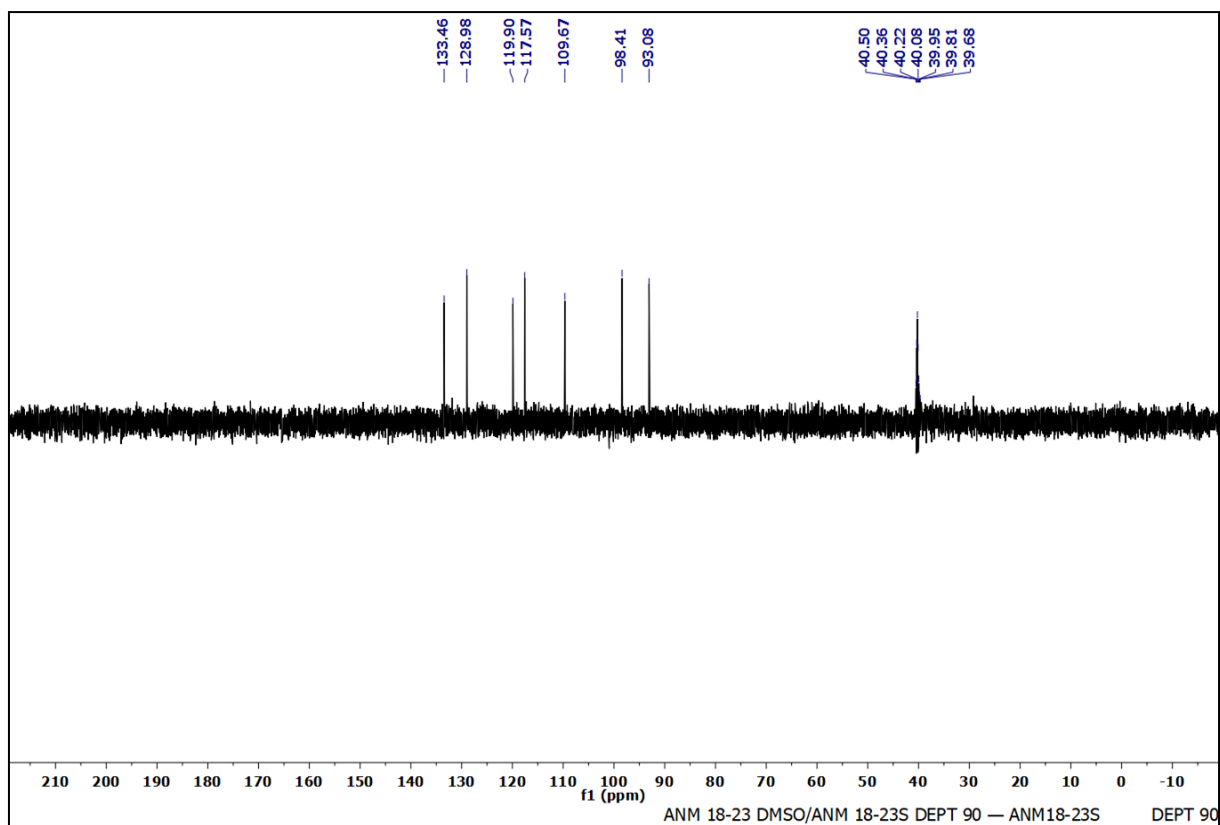

Figure S8. DEPT-90 NMR of Compound 1.

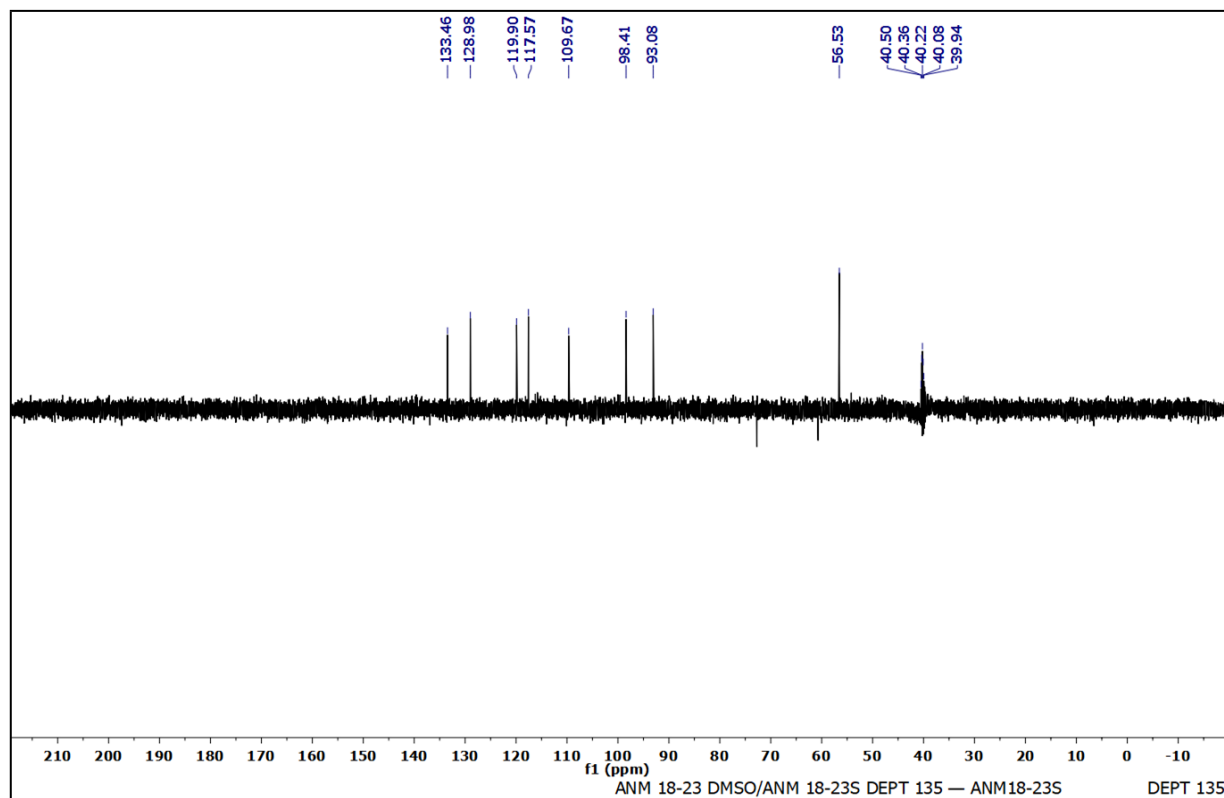

Figure S9. DEPT-135 NMR of Compound 1.

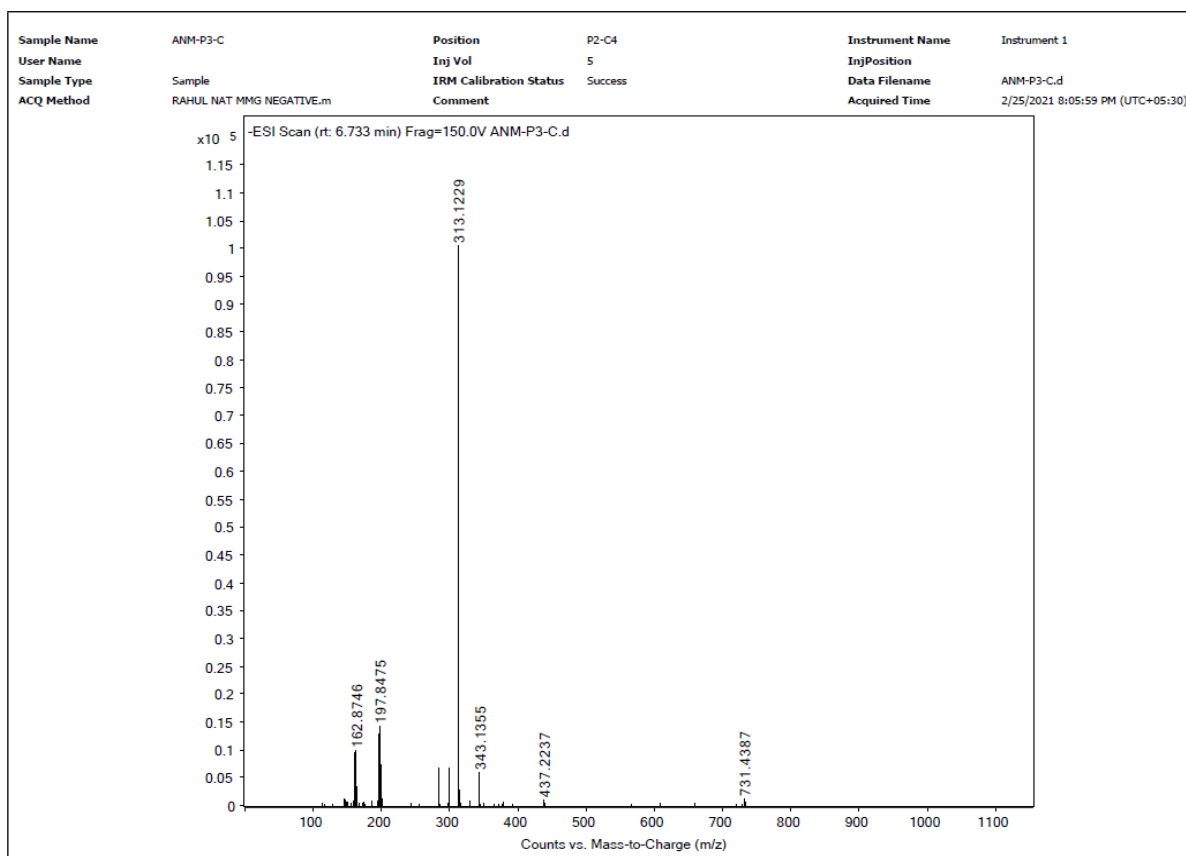

**Figure S 10.** HRMS Spectra of **Compound 2**.

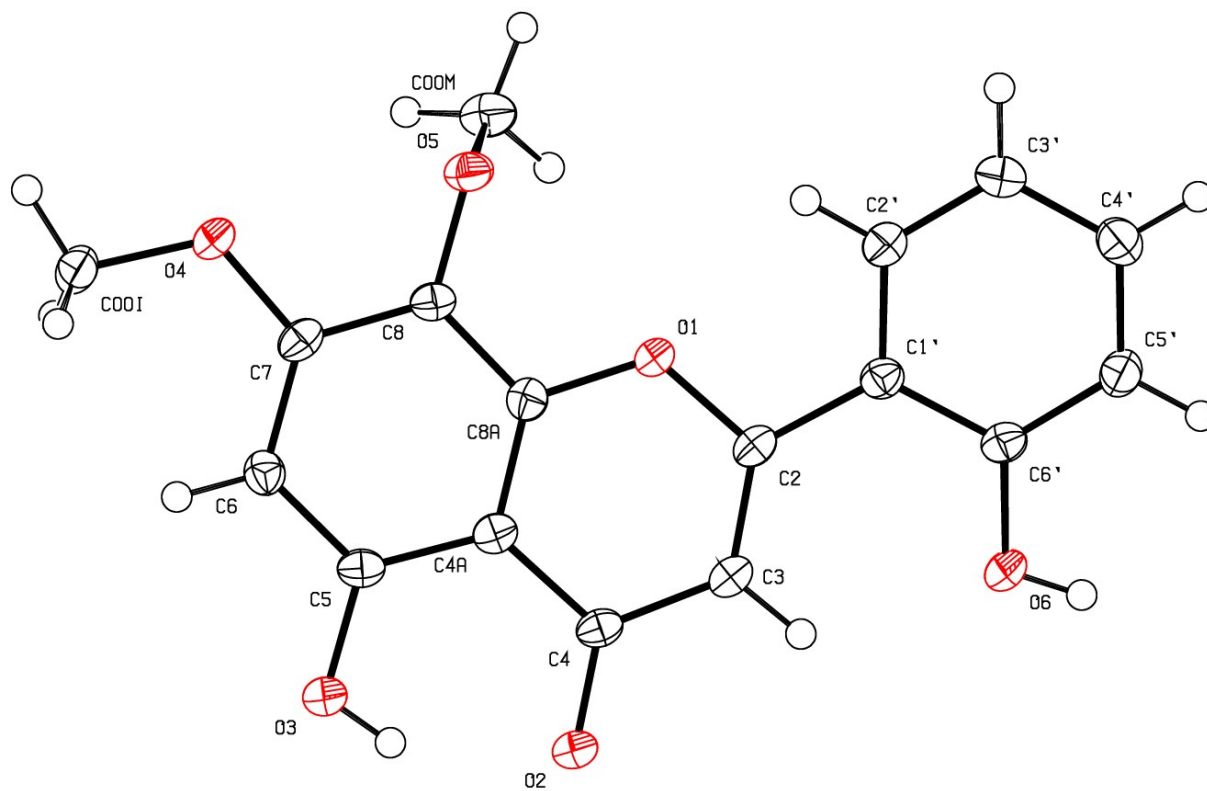

**Figure S11.** Thermal ellipsoid plot of **Compound 2** (CCDC No: 2072155). Ellipsoids are represented with 50% probability.

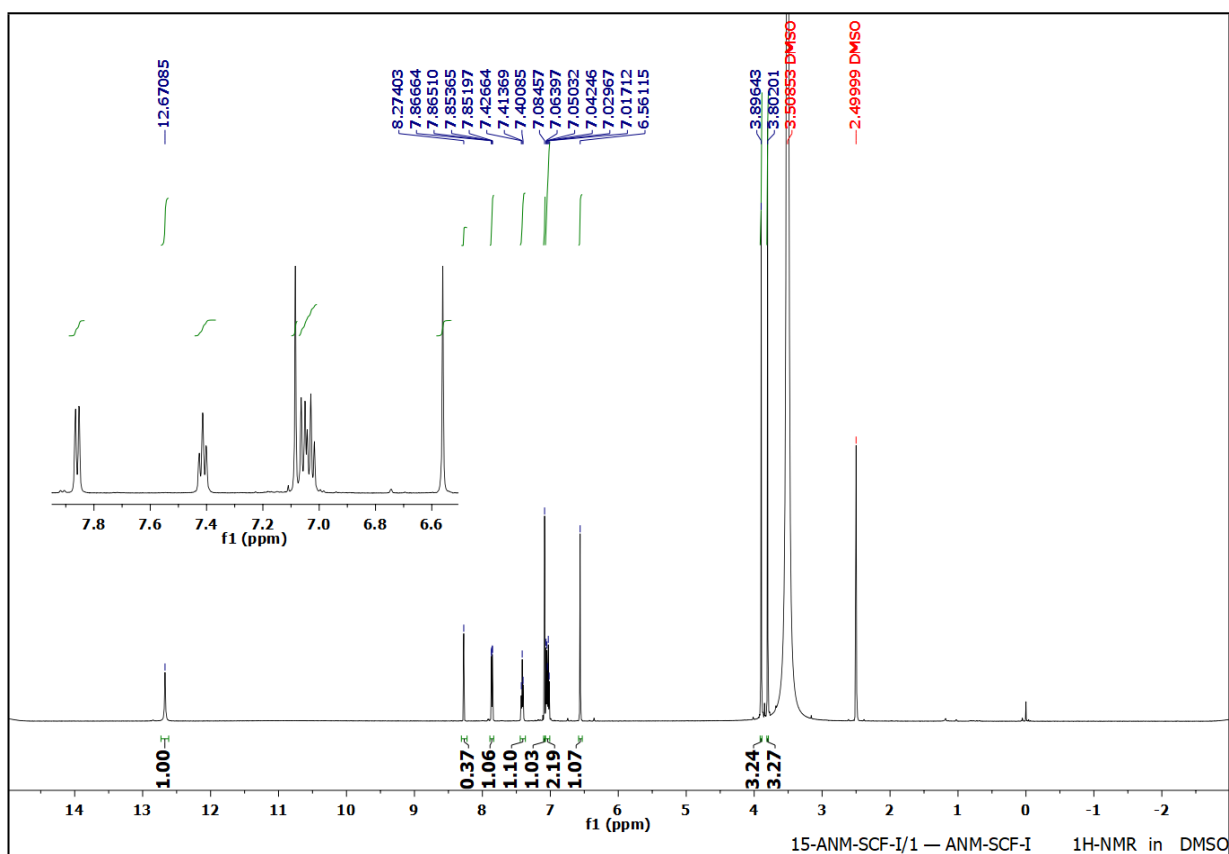

Figure S12.  $^1\text{H}$  NMR of Compound 2.

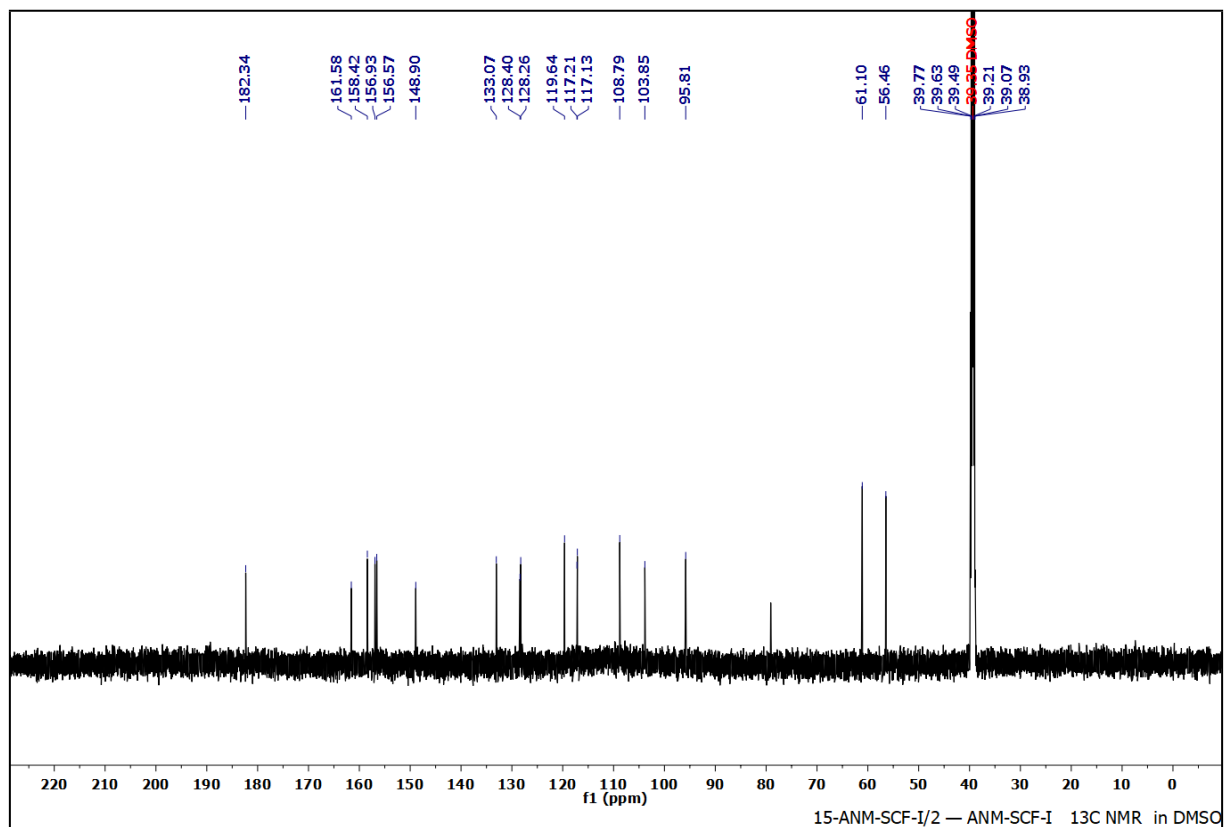

Figure S13.  $^{13}\text{C}$  NMR of Compound 2.

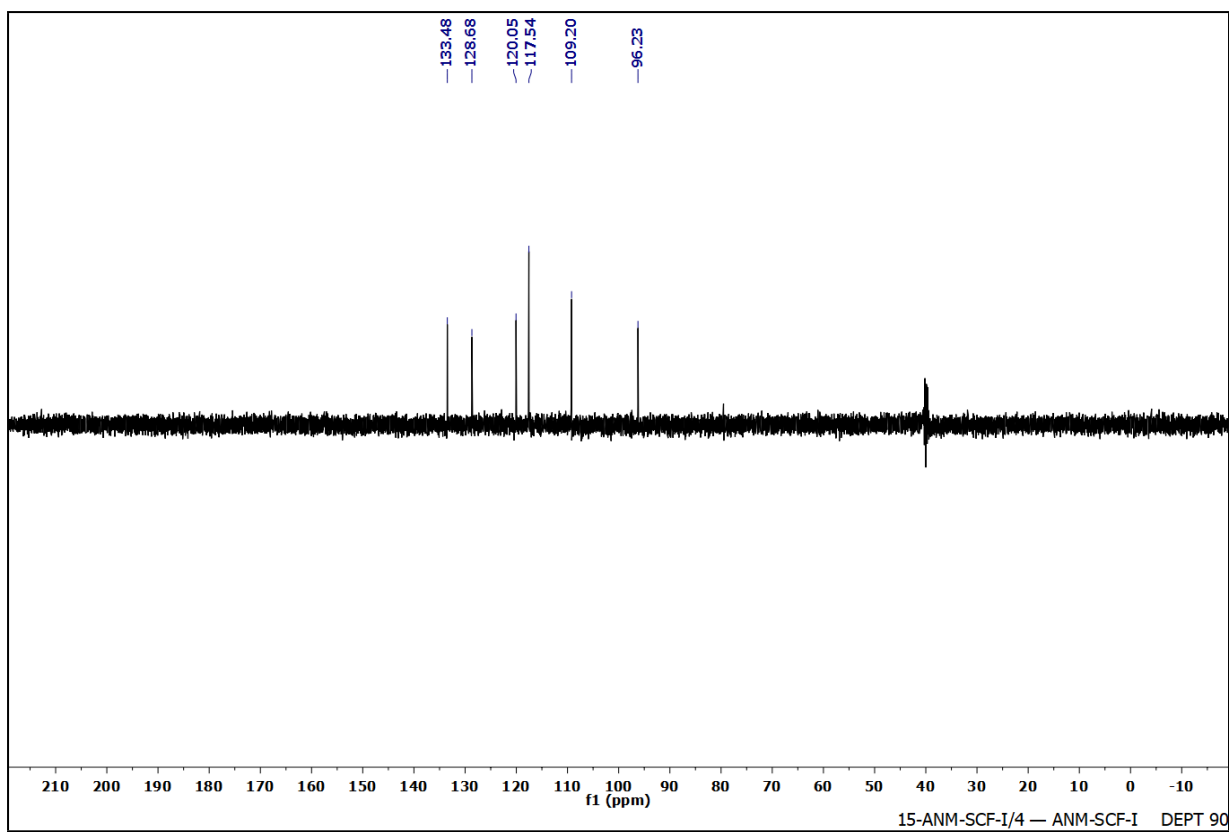

Figure S14. DEPT-90 NMR of **Compound 2**.

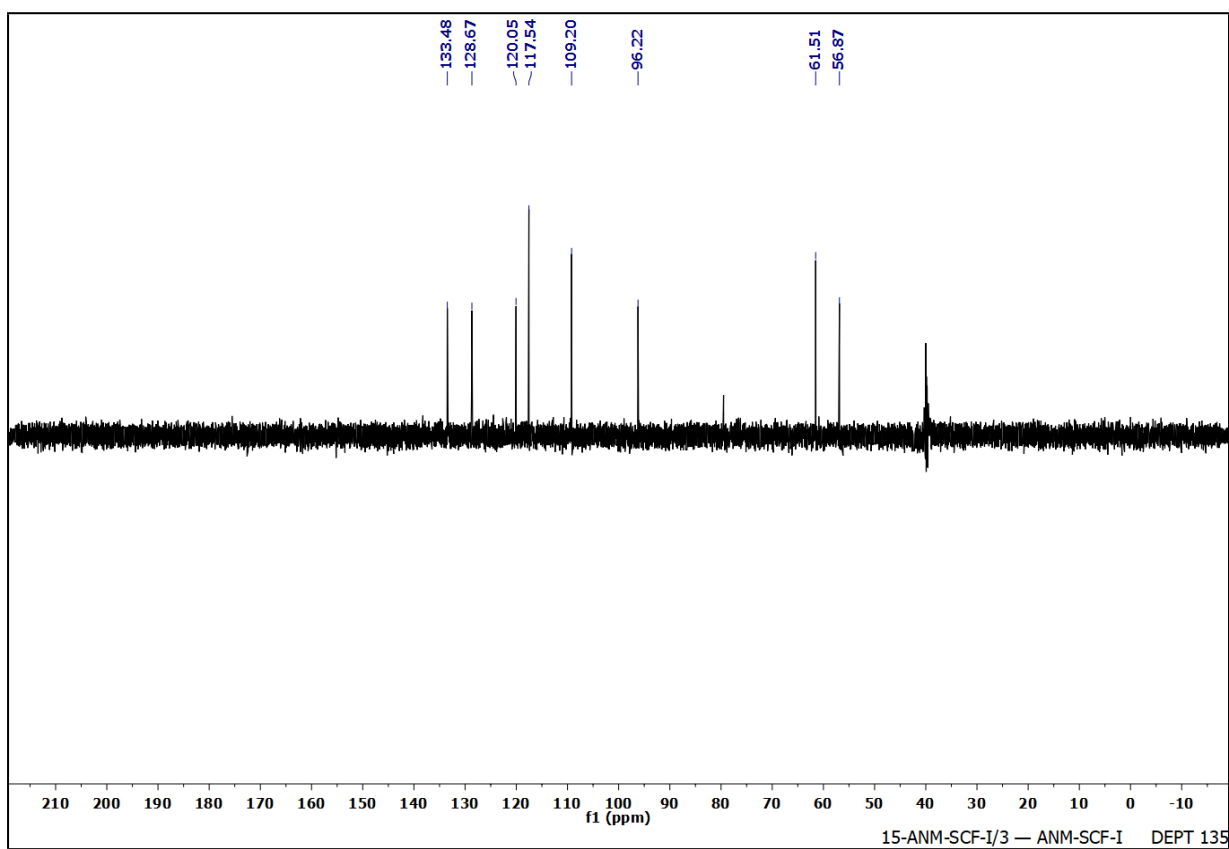

Figure S15. DEPT-135 NMR Spectra of **Compound 2**.



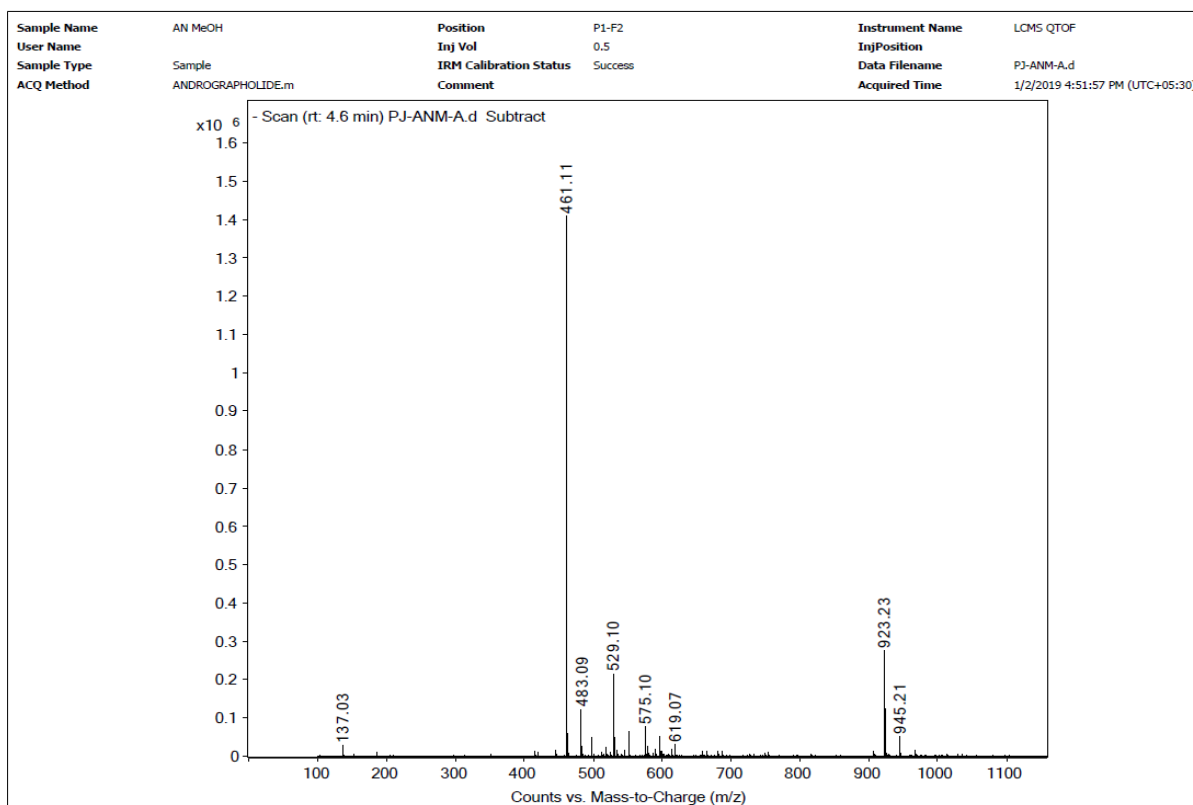

**Figure S16.** HRMS Spectra of **Compound 3**.

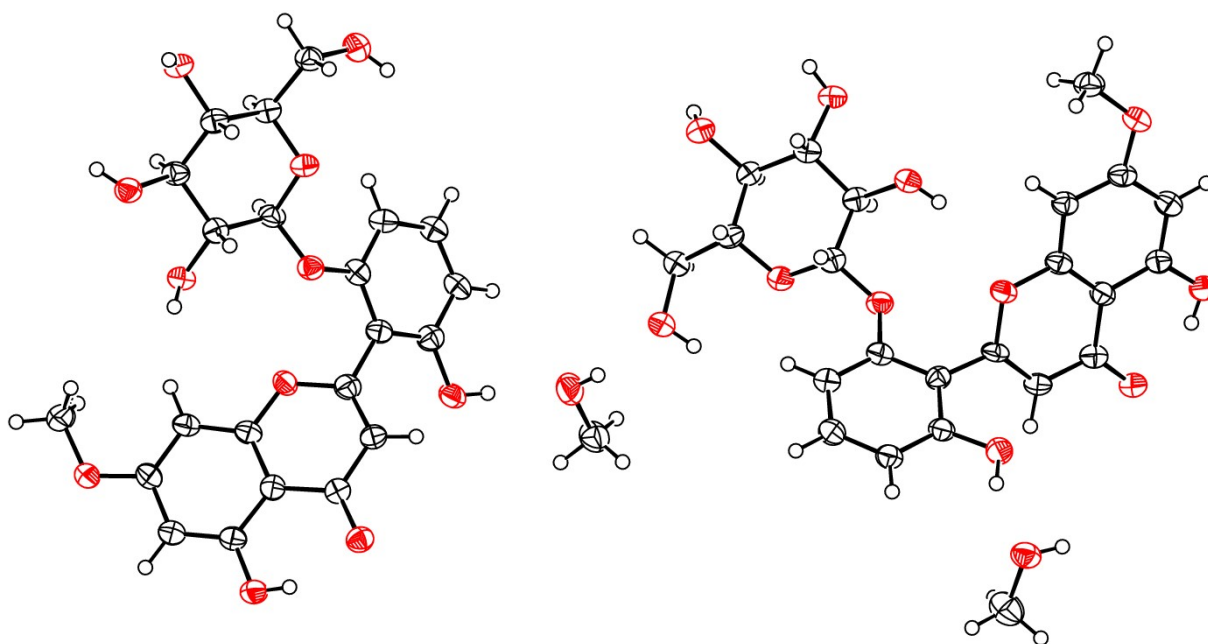

**Figure S17.** Thermal ellipsoid plot of **Compound 3** (CCDC No.: 2072714). Ellipsoids are represented with 50% probability.

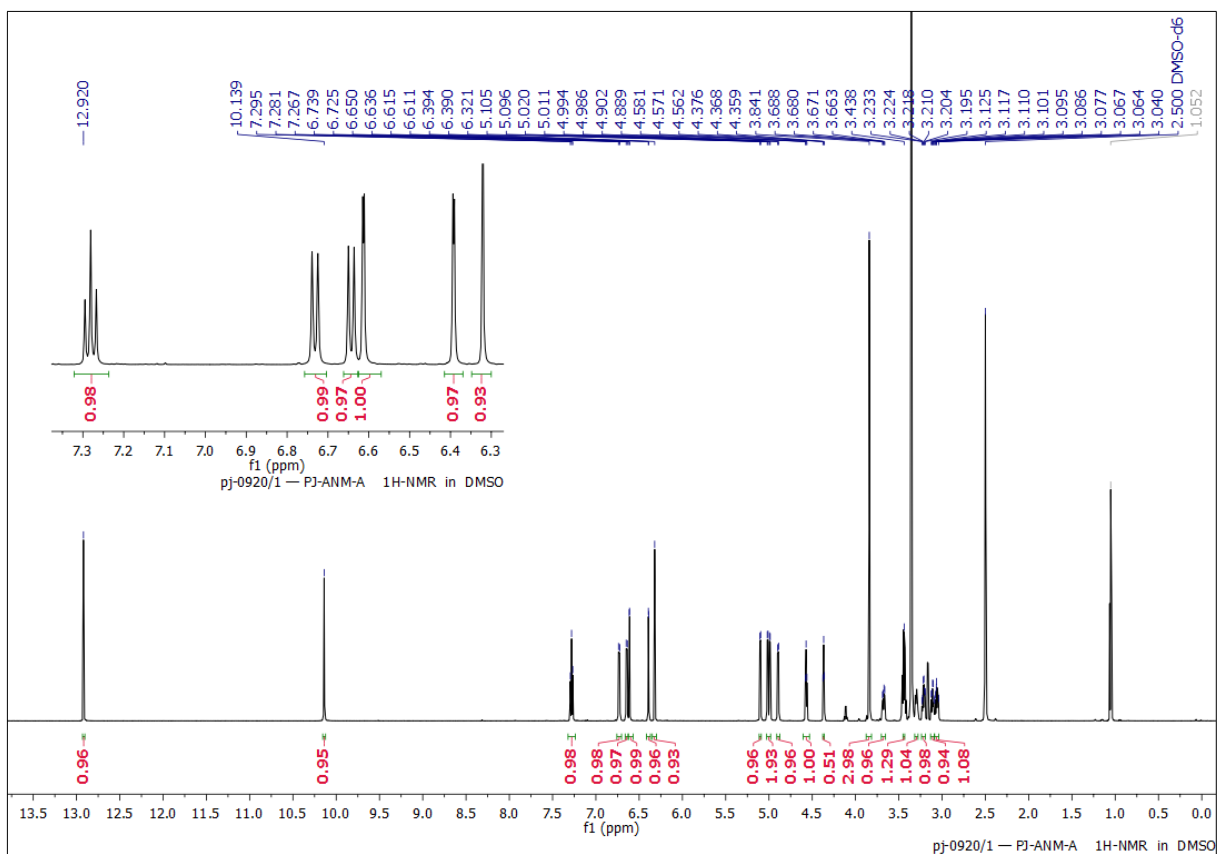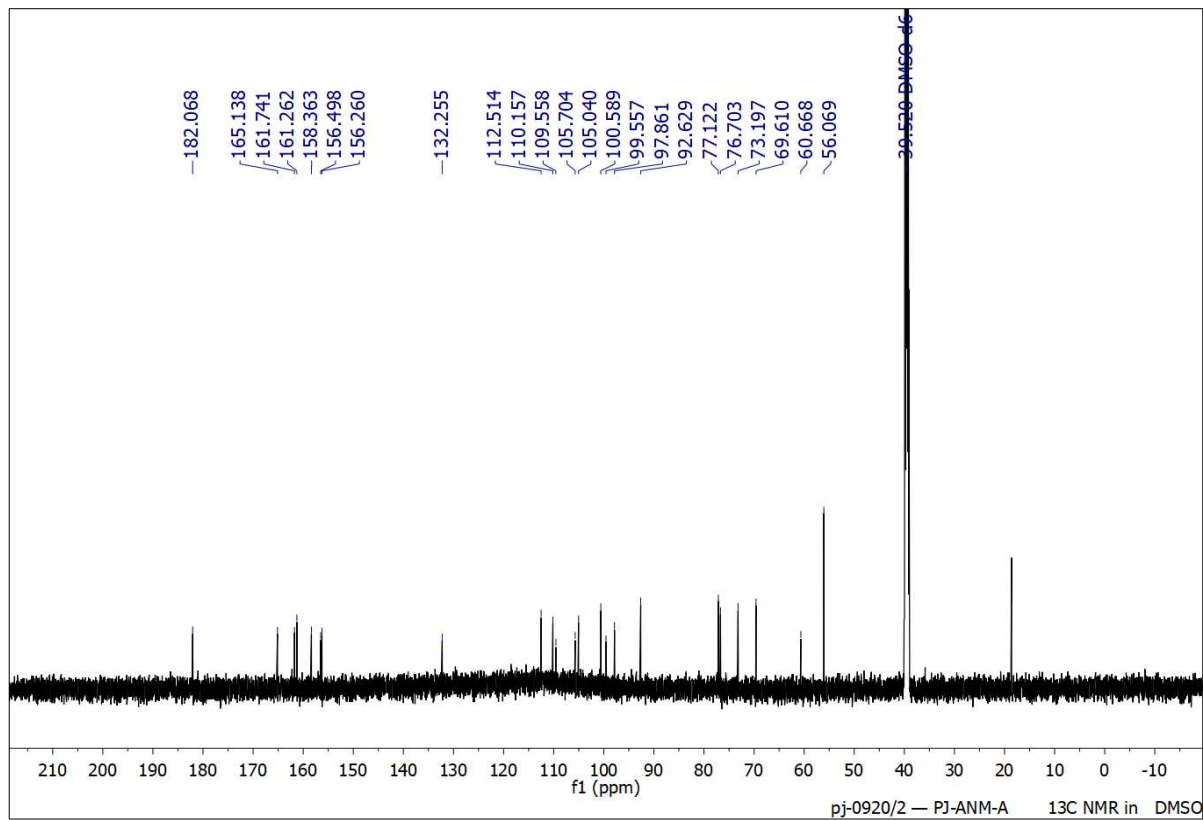

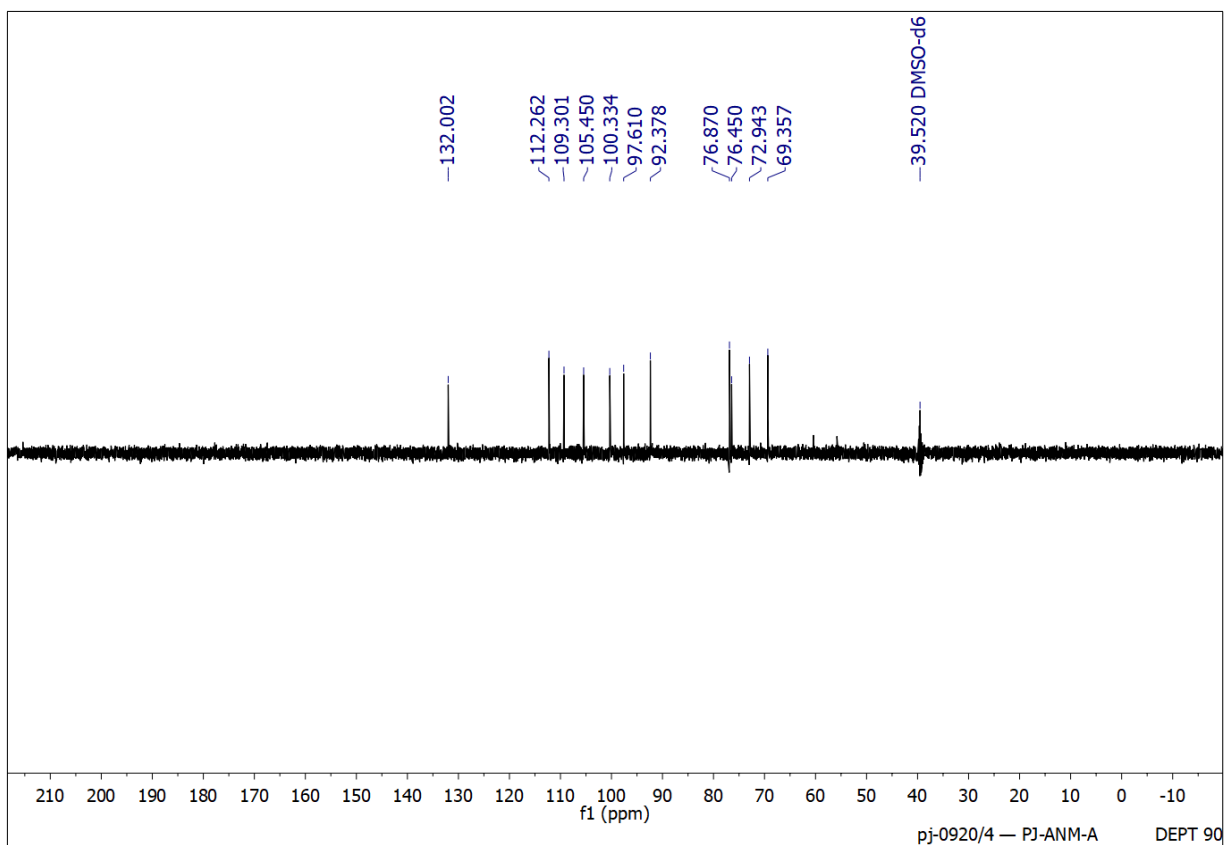

Figure S20. DEPT-90 NMR of Compound 3.

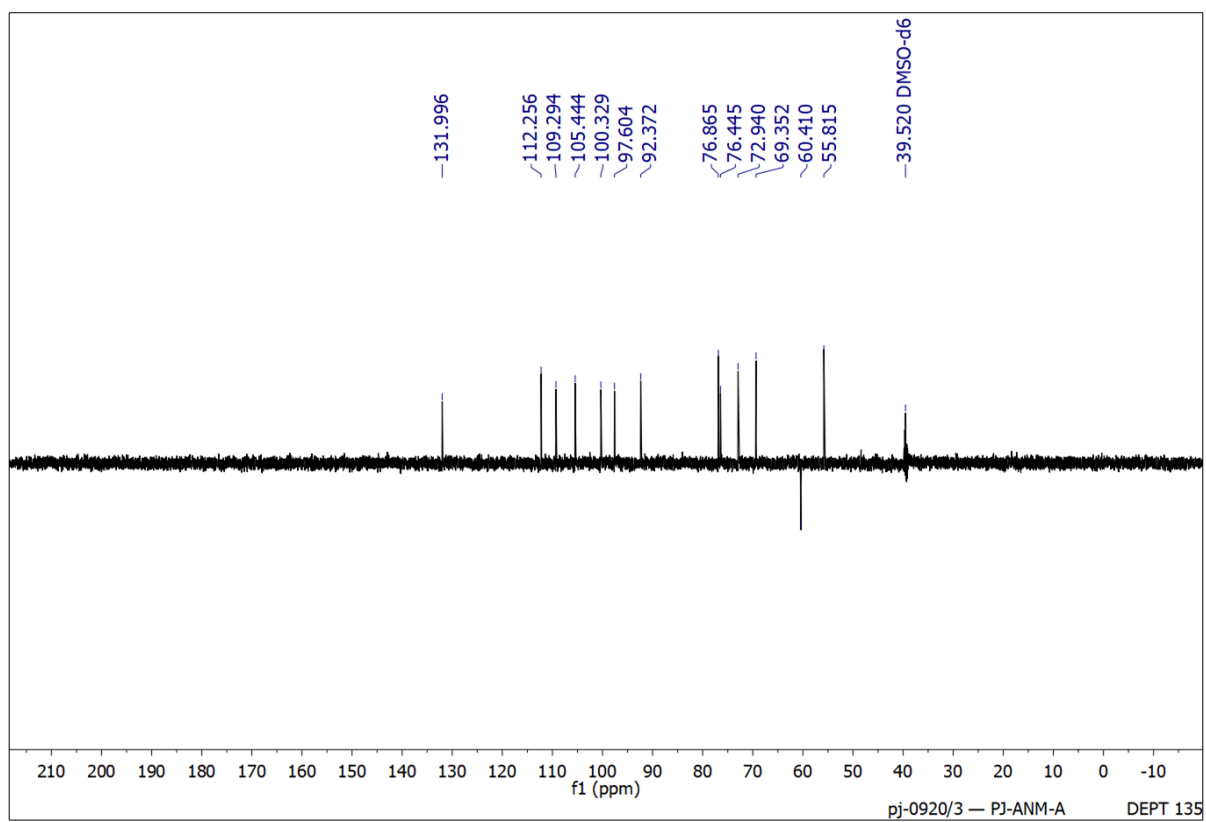

Figure S21. DEPT-135 NMR of Compound 3.

CheckCif alerts are listed according to Alert Level for Compound 3. Response is in bold.

**Compound 3 (CCDC Deposition No.: 2072714)**

**Datablock: anm\_28\_ml\_25\_0m\_a**

**Alert level B**

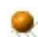

**Alert level B**

PLAT417\_ALERT\_2\_B Short Inter D-H..H-D H1 ..H5\_2 . 2.06 Ang.

x,y,z = 1\_555 Check

PLAT420\_ALERT\_2\_B D-H Bond Without Acceptor O11\_1 --H11\_1 . Please Check

**Author Response**

We tried many times to get better data for this structure, but due to enantiomeric impurity, twinning, low crystal quality, the  $R_1$  value is high. These alerts are all related to the hydrogen atoms of the solvent molecule and due to intermolecular hydrogen bonding within the compound. Since hydrogen atoms have low scattering power, it is challenging to locate them using X-ray data precisely. To add the hydrogen atoms, we used two methods: DIF-Fourier maps and HADD orders. The latest HADD instructions yield the best results. This structure is reported to support the molecule's conformation, which can be determined based on available data, and we are confident that the structural characterization is valid.

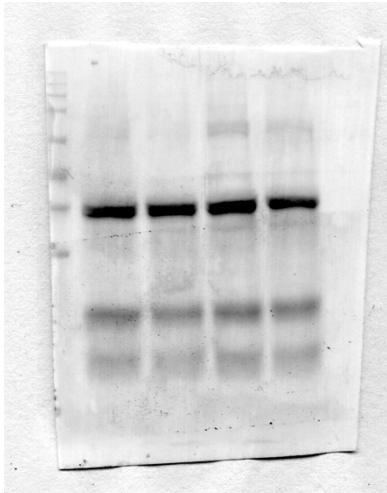

**$\beta$ -actin**

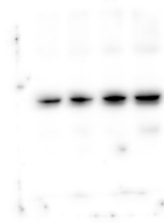

**PUMA  $\alpha$**

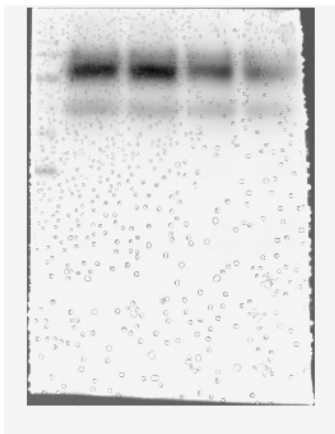

**Bcl 2**

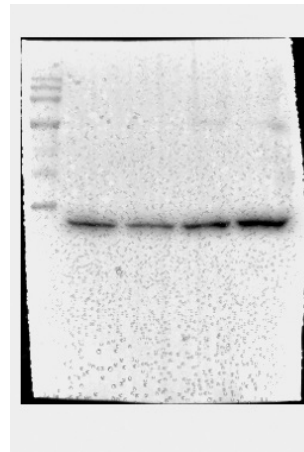

**Cleaved Caspase 9**

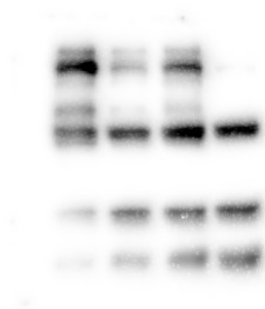

**Cleaved Parp-1**

**Figure S22:** Raw validation data and unprocessed original images of gels and western blots related to **Fig. 4**
